# Supplementary material for: Identification and Characterization of ten Escherichia coli Strains encoding Novel Shiga Toxin 2 Subtypes, Stx2n as well as Stx2j, Stx2m, and Stx2o, in the United States
Source: Preprints.org preprint supplement (doi:10.20944/preprints202309.1481.v1), 2023-09-21
Supplement: Supplementary file 2 [file Supplementary table S2_database overview.xlsx]

## Sheet: Revised database
Supplementary Table S2: Sequence information including Accession numbers, protein and nucleotide sequences
Variant	Number	Acc. No.	AA sequence	Subtype	CGE number	CGE Acc. No.	nn sequence
Stx2a-A-haemolyticus	28	DQ344636	mkcilfkwvlclllgfssvsysreftidfstqqsyvsslnsirteistplehisqgttsvsvinhtppgsyfavdirgld vyqarfdhlrliieqnnlyvagfvntatntfyrfsdfthisvpgvttvsmttdssyttlqrvaalersgmqisrhslvss ylalmefsgntmtrdasravlrfvtvtaqalrfrqiqrefrqalsetapvytmtpgdvdltlnwgrisnvlpeyrgedgv rvgrisfnnisailgtvavilnchhqgarsvravneesqpecqitgdrpvikinntlwesntaaaflnrksqflyttgkm kkmfmavlfalasvnamaadcakgkiefskyneddtftvkvdgkeywtsrwnlqpllqsaqltgmtvtiksstce…	>stx2	28	DQ344636	ATGAAGTGTATATTATTTAAATGGGTACTGTGCCTGTTACTGGGTTTTTCTTCGGTATCCTATTCCCGGGAGTTTACGATAGACTTTTCGACCCAACAAAGTTATGTCTCTTCGTTAAATAGTATACGGACAGAGATATCGACCCCTCTTGAACATATATCTCAGGGGACCACATCGGTGTCTGTTATTAACCACACCCCACCGGGCAGTTATTTTGCTGTGGATATACGAGGGCTTGATGTCTATCAGGCGCGTTTTGACCATCTTCGTCTGATTATTGAGCAAAATAATTTATATGTGGCCGGGTTCGTTAATACGGCAACAAATACTTTCTACCGTTTTTCAGATTTTACACATATATCAGTGCCCGGTGTGACAACGGTTTCCATGACAACGGAC…
Stx2a-E-cloacae-95MV2	12	Z50754	mkcilfkwvlclllgfssvsysreftidlstqqsyvsslnsirteistplehisqgttsvsvinhtppgsyfavdirgld vyqarfdhlrliieqnnlyvagfvntatntfyrfsdfthisvpgvttvsmttdssyttlqrvaalersgmqisrhslvss ylalmefsgntmtrdasravlrfvtvtaealrfrqiqrefrqalsetapvytmtagdvdltlnwgrisnvlpeyrgedgv rvgriscnnisailgtvavilnchhqgarsvravneesqpecqitgdrpvikinntlwesntaaaflnrksqflyttgkm kkmfmavlfalvsvnamaadcakgkiefskyneddtftvkvdgkeywtsrwnlqpllqsaqltgmtvtiksstce…	>stx2	12	Z50754	ATGAAGTGTATATTATTTAAATGGGTACTGTGCCTGTTACTGGGTTTTTCTTCGGTATCCTATTCCCGGGAATTTACGATAGACCTTTCGACCCAACAAAGTTATGTCTCTTCGTTAAATAGTATACGGACAGAGATATCGACCCCTCTTGAACATATATCTCAGGGGACCACATCGGTGTCTGTTATTAACCACACCCCGCCGGGCAGTTATTTTGCTGTGGATATACGAGGGCTTGATGTCTATCAGGCGCGTTTTGACCATCTTCGTCTGATTATTGAGCAAAATAATTTATATGTGGCCGGGTTCGTTAATACGGCAACAAATACTTTCTACCGTTTTTCAGATTTTACACATATATCAGTGCCCGGTGTGACAACGGTTTCCATGACAACGGAC…
Stx2a-O101-EBC201	13	AY443052	mkcilfkwvlclllgfssvsysreftidfstqqsyvsslnsirteistplehisqgttsvsvinhtppgsyfavdirgld vyqarfdhlrliieqnnlyvagfvntatntfyrfsdfthisvpgvttvsmttdssyttlqrvaalersgmqisrhslvss ylalmefsgntmtrdasravlrfvtvtaealrfrqiqrefrqalsetapvytmtpgdvdltlnwgrisnvlpeyrgedgv rvgrisfnnisailgtvavilnchhqgarsvravnedsqpecqitgdrpvikinntlwesntaaaflnrksqflyttgkm kkmfmavlfalvsvnamaadcakgkiefskyneddtftvkvdgkeywtsrwnlqpllqsaqltgmtvtiksstce…	>stx2	13	AY443052	ATGAAGTGTATATTATTTAAATGGGTACTGTGCCTGTTACTGGGTTTTTCTTCGGTATCCTATTCCCGGGAATTTACGATAGACTTTTCGACTCAACAAAGTTATGTCTCTTCGTTAAATAGTATACGGACAGAGATATCGACCCCTCTTGAACATATATCTCAGGGGACCACATCGGTGTCTGTTATTAACCACACCCCGCCGGGCAGTTATTTTGCTGTGGATATACGAGGGCTTGATGTCTATCAGGCGCGTTTTGACCATCTTCGTCTGATTATTGAGCAAAATAATTTATATGTGGCCGGGTTCGTTAATACGGCAACAAATACTTTCTACCGTTTTTCAGATTTTACACATATATCAGTGCCCGGTGTGACAACGGTTTCCATGACAACGGAC…
Stx2a-O104-G5506	18	EF441619	mkcilfkwvlclllgfssvsysreftidfstqqsyvsslnsirteistplehisqgttsvsvinhtppgsyfavdirgld vyqarfdhlrliieqnnlyvagfvntatntfyrfsdfthisvpgvttvsmttdssyttlqrvaalersgmqisrhslvss ylalmefsgntmtrdasravlrfvtvtaealrfrqiqrefrqalsetapvytmtpgdvdltlnwgrisnvlpeyrgedgv rvgrisfnnisailgtvavilnchhqgarsvravneesqpecqitgdrpvikinntlwesntaaaflnrksqslyttgem kkmfmavlfalvsvnamaadcakgkiefskyneddtftvkvdgkeywtsrwnlqpllqsaqltgmtvtiksstce…	>stx2	18	EF441619	ATGAAGTGTATATTATTTAAATGGGTACTGTGCCTGTTACTGGGTTTTTCTTCGGTATCCTATTCCCGGGAATTTACGATAGACTTTTCGACTCAACAAAGTTATGTCTCTTCGTTAAATAGTATACGGACAGAGATATCGACCCCTCTTGAACATATATCTCAGGGGACCACATCGGTGTCTGTTATTAACCACACCCCGCCGGGCAGTTATTTTGCTGTGGATATACGAGGGCTTGATGTCTATCAGGCGCGTTTTGACCATCTTCGTCTGATTATTGAGCAAAATAATTTATATGTGGCCGGGTTCGTTAATACGGCAACAAATACTTTCTACCGTTTTTCAGATTTTACACATATATCAGTGCCCGGTGTGACAACGGTTTCCATGACAACGGAC…
Stx2a-O111-928-91	29	EF441609	mkcilfkwvlclllgfssvsysreftidfstqqsyvsslnsirteistplehisqgttsvsvinhtppgsyfavdirgld vyqarfdhlrliieqnnlyvagfvntatntfyrfsdfthisvpgvttvsmttdssyttlqrvaalersgmqisrhslvss ylalmefsgntmtrdasravlrfvtvtaealrfrqiqrefrqalsetapvytmtpgdvdltlnwgrisnvlpeyrgedgv rvgrisfnnisailgtvavilnchhqgarsvravneesqpecqitgdrpvikinntlwesntaaaflnrksqflyttgkm kkmfmavlfalasvnamaadcakgkiefskyneddtftvkvdgkeywtsrwnlqpllqsaqltgmtvtlksstce…	>stx2	29	EF441609	ATGAAGTGTATATTATTTAAATGGGTACTGTGCCTGTTACTGGGTTTTTCTTCGGTATCCTATTCCCGGGAGTTTACGATAGACTTTTCGACCCAACAAAGTTATGTCTCTTCGTTAAATAGTATACGGACAGAGATATCGACCCCTCTTGAACATATATCTCAGGGGACCACATCGGTGTCTGTTATTAACCACACCCCACCGGGCAGTTATTTTGCTGTGGATATACGAGGGCTTGATGTCTATCAGGCGCGTTTTGACCATCTTCGTCTGATTATTGAGCAAAATAATTTATATGTGGCCGGGTTCGTTAATACGGCAACAAATACTTTCTACCGTTTTTCAGATTTTACACATATATCAGTGCCCGGTGTGACAACGGTTTCCATGACAACGGAC…
Stx2a-O113-CL-3	32	EF441618	mkcilfkwvlclllgfssvsysreftidfstqqsyvsslnsirteistplehisqgttsvsvinhtppgsyfavdirgld vyqarfdhlrliieqnnlyvagfvntatntfyrfsdfthisvpgvttvsmttdssyttlqrvaalersgmqisrhslvss ylalmefsgntmtrdasravlrfvtvtaealrfrqiqrefrqalsetapvytmtpgdvdltlnwgrisnvlpeyrgedgv rvgrisfnnisailgtvavilnchhqgarsvravneesqpecqitgdrpvikinntlwesntaaaflnrksqflyttgkm kkmfmavlfalvsvnamaadcakgkiefskyneddtftvkvagkeywtsrwnlqpllqsaqltgmtvtiksstce…	>stx2	32	EF441618	ATGAAGTGTATATTATTTAAATGGGTACTGTGCCTGTTACTGGGTTTTTCTTCGGTATCCTATTCCCGGGAGTTTACGATAGACTTTTCGACCCAACAAAGTTATGTCTCTTCGTTAAATAGTATACGGACAGAGATATCGACCCCTCTTGAACATATATCTCAGGGGACCACATCGGTGTCTGTTATTAACCACACCCCGCCGGGCAGTTATTTTGCTGTGGATATACGAGGGCTTGATGTCTATCAGGCGCGTTTTGACCATCTTCGTCTGATTATTGAGCAAAATAATTTATATGTGGCCGGGTTCGTTAATACGGCAACAAATACTTTCTACCGTTTTTCAGATTTTACACATATATCAGTGCCCGGTGTGACAACGGTTTCCATGACAACGGAC…
Stx2a-O113-TS17-08	1	FM998851	mkcilfkwvlclllgfssvsysreftidfstqqsyvsslnsirteistplehisqgttsvsvinhtppgsyfavdirgld vyqarfdhlrliieqnnlyvagfvntatntfyrfsdfthisvpgvttvsmttdssyttlqrvaalersgmqisrhslvss ylalmefsgntmtrdasravlrfvtvtaealrfrqiqrefrqalsetapvytmtpgdvdltlnwgrisnvlpeyrgedgv rvgrisfnnisailgtvavilnchhqgarsvravneesqpecqitgdrpvikinntlwesntaaaflnrksqflyttgkm kkmfmavlfalvsvnamaadcakgkiefskyneddtftvkvdgkeywtsrwnlqpllqsaqltgmtvtiksstce…	>stx2	1	FM998851	atgaagtgtatattatttaaatgggtactgtgcctgttactgggtttttcttcggtatcctattcccgggaatttacgatagacttttcgactcaacaaagttatgtctcttcgttaaatagtatacggacagagatatcgacccctcttgaacatatatctcaggggaccacatcggtgtctgttattaaccacaccccgccgggcagttattttgctgtggatatacgagggcttgatgtctatcaggcgcgttttgaccatcttcgtctgattattgagcaaaataatttatatgtggccgggttcgttaatacggcaacaaatactttctaccgtttttcagattttacacatatatcagtgcccggtgtgacaacggtttccatgacaacggac…
Stx2a-O136-VTB60	27	AY633471	mkcilfkwvlclllgfssvsysreftidfstqqsyvsslnsirteistplehisqgttsvsvinhtppgsyfavdirgld vyqarfdhlrliieqnnlyvagfvntatntfyrfsdfthisvpgvttvsmttdssyttlqrvaalersgmqisrhslvss ylalmefsgntmtrdasravlrfvtvtaealrfrqiqrefrqalsetapvytmtpgdvdltlnwgrisnvlpeyrgedgv rvgrisfnnisailgtvavilnchhqgarsvravnedsqpecqitgdrpvikinntlwesntaaaflnrksqflyttgkm kkmfmavlfalasvnamaadcakgkiefskyneddtftvkvdgkeywtsrwnlqpllqsaqltgmtvtiksstce…	>stx2	27	AY633471	ATGAAGTGTATATTATTTAAATGGGTACTGTGCCTGTTACTGGGTTTTTCTTCGGTATCCTATTCCCGGGAGTTTACGATAGACTTTTCGACCCAACAAAGTTATGTCTCTTCGTTAAATAGTATACGGACAGAGATATCGACCCCTCTTGAACATATATCTCAGGGGACCACATCGGTGTCTGTTATTAACCACACCCCACCGGGCAGTTATTTTGCTGTGGATATACGAGGGCTTGATGTCTATCAGGCGCGTTTTGACCATCTTCGTCTGATTATTGAGCAAAATAATTTATATGTGGCCGGGTTCGTTAATACGGCAACAAATACTTTCTACCGTTTTTCAGATTTTACACATATATCAGTGCCCGGTGTGACAACGGTTTCCATGACAACGGAC…
Stx2a-O157-93-111	30	EF441599	mkcilfkwvlclllgfssvsysreftidfstqqsyvsslnsirteistplehisqgttsvsvinhtppgsyfavdirgld vyqarfdhlrliieqnnlyvagfvntatntfyrfsdfthisvpgvttvsmttdssyttlqrvaalersgmqisrhslvss ylalmefsgntmtrdasravlrfvtvtaealrfrqiqrefrqalsetapvytmtpgdvdltlnwgrisnvlpeyrgedgv rvgrisfnnisailgtvavilnchhqgarsvravneesqpecqitgdrpvikinntlwesntaaaflnrksqflyttgkm kkmfmavlfalasvnamaadcakgkiefskyneddtftvkvdgkeywtsrwnlqpslqsaqltgmtvtiksstce…	>stx2	30	EF441599	ATGAAGTGTATATTATTTAAATGGGTACTGTGCCTGTTACTGGGTTTTTCTTCGGTATCCTATTCCCGGGAGTTTACGATAGACTTTTCGACCCAACAAAGTTATGTCTCTTCGTTAAATAGTATACGGACAGAGATATCGACCCCTCTTGAACATATATCTCAGGGGACCACATCGGTGTCTGTTATTAACCACACCCCACCGGGCAGTTATTTTGCTGTGGATATACGAGGGCTTGATGTCTATCAGGCGCGTTTTGACCATCTTCGTCTGATTATTGAGCAAAATAATTTATATGTGGCCGGGTTCGTTAATACGGCAACAAATACTTTCTACCGTTTTTCAGATTTTACACATATATCAGTGCCCGGTGTGACAACGGTTTCCATGACAACGGAC…
Stx2a-O157-A397	25	AY633472	mkcilfkwvlclllgfssvsssreftidfstqqsyvsslnsirteistplehisqgttsvsvinhtppgsyfavdirgld vyqarfdhlrliieqnnlyvagfvntatntfyrfsdfthisvpgvttvsmttdssyttlqrvaalersgmqisrhslvss ylalmefsgntmtrdasravlrfvtvtaealrfrqiqrefrqalsetapvytmtpgdvdltlnwgrisnvlpeyrgedgv rvgrisfnnisailgtvavilnchhqgarsvravneesqpecqitgdrpvikinntlwesntaaaflnrksqflyttgkm kkmfmavlfalasvnamaadcakgkiefskyneddtftvkvagkeywtsrwnlqpllqsaqltgmtvtiksstce…	>stx2	25	AY633472	ATGAAGTGTATATTATTTAAATGGGTACTGTGCCTGTTACTGGGTTTTTCTTCGGTATCCTCTTCCCGGGAGTTTACGATAGACTTTTCGACCCAACAAAGTTATGTCTCTTCGTTAAATAGTATACGGACAGAGATATCGACCCCTCTTGAACATATATCTCAGGGGACCACATCGGTGTCTGTTATTAACCACACCCCACCGGGCAGTTATTTTGCTGTGGATATACGAGGGCTTGATGTCTATCAGGCGCGTTTTGACCATCTTCGTCTGATTATTGAGCAAAATAATTTATATGTGGCCGGGTTCGTTAATACGGCAACAAATACTTTCTACCGTTTTTCAGATTTTACACATATATCAGTGCCCGGTGTGACAACGGTTTCCATGACAACGGAC…
Stx2a-O157-EDL933	31	X07865	mkcilfkwvlclllgfssvsysreftidfstqqsyvsslnsirteistplehisqgttsvsvinhtppgsyfavdirgld vyqarfdhlrliieqnnlyvagfvntatntfyrfsdfthisvpgvttvsmttdssyttlqrvaalersgmqisrhslvss ylalmefsgntmtrdasravlrfvtvtaealrfrqiqrefrqalsetapvytmtpgdvdltlnwgrisnvlpeyrgedgv rvgrisfnnisailgtvavilnchhqgarsvravneesqpecqitgdrpvikinntlwesntaaaflnrksqflyttgkm kkmfmavlfalasvnamaadcakgkiefskyneddtftvkvdgkeywtsrwnlqpllqsaqltgmtvtiksstce…	>stx2	31	X07865	ATGAAGTGTATATTATTTAAATGGGTACTGTGCCTGTTACTGGGTTTTTCTTCGGTATCCTATTCCCGGGAGTTTACGATAGACTTTTCGACCCAACAAAGTTATGTCTCTTCGTTAAATAGTATACGGACAGAGATATCGACCCCTCTTGAACATATATCTCAGGGGACCACATCGGTGTCTGTTATTAACCACACCCCACCGGGCAGTTATTTTGCTGTGGATATACGAGGGCTTGATGTCTATCAGGCGCGTTTTGACCATCTTCGTCTGATTATTGAGCAAAATAATTTATATGTGGCCGGGTTCGTTAATACGGCAACAAATACTTTCTACCGTTTTTCAGATTTTACACATATATCAGTGCCCGGTGTGACAACGGTTTCCATGACAACGGAC…
Stx2a-O157-I6581	26	EF441613	mkcilfkwvlclllgfssvsysreftidfstqqsyvsslnsirteistplehisqgttsvsvinhtppgsyfavdirgld vyqarfdhlrliieqnnlyvagfvntatntfyrfsdfthisvpgvttvsmttdssyttlqrvaalersgmqisrhslvss ylalmefsgntmtrdasravlrfvtvtaealrfrqiqrefrqalsetapvytmtpgdvdltlnwgrisnvlpeyrgedgv rvgrisfnnisailgtvavilnchhqgarsvravneesqpecqitgdrpvikinntlwesntaaaflnrksqflyttgkm kkmfmavlfalasvnamaadcakgkiefskyneddtftvkvagkeywtsrwnlqpllqsaqltgmtvtiksstce…	>stx2	26	EF441613	ATGAAGTGTATATTATTTAAATGGGTACTGTGCCTGTTACTGGGTTTTTCTTCGGTATCCTATTCCCGGGAGTTTACGATAGACTTTTCGACCCAACAAAGTTATGTCTCTTCGTTAAATAGTATACGGACAGAGATATCGACCCCTCTTGAACATATATCTCAGGGGACCACATCGGTGTCTGTTATTAACCACACCCCACCGGGCAGTTATTTTGCTGTGGATATACGAGGGCTTGATGTCTATCAGGCGCGTTTTGACCATCTTCGTCTGATTATTGAGCAAAATAATTTATATGTGGCCGGGTTCGTTAATACGGCAACAAATACTTTCTACCGTTTTTCAGATTTTACACATATATCAGTGCCCGGTGTGACAACGGTTTCCATGACAACGGAC…
Stx2a-O157-SF-258-98	15	AF524944	mkcilfkwvlclllgfssvsysreftidfstqqsyvsslnsirteistplehisqgttsvsvinhtppgsyfavdirgld vyqarfdhlrliieqnnlyvagfvntatntfyrfsdfthisvpdvttvsmttdssyttlqrvaalersgmqisrhslvss ylalmefsgntmtrdasravlrfvtvtaealrfrqiqrefrqalsetapvytmtpgdvdltlnwgrisnvlpeyrgedgv rvgrisfnnisailgtvavilnchhqgarsvravneesqpecqitgdrpvikinntlwesntaaaflnrksqflyttgkm kkmfmavlfalvsvnamaadcakgkiefskyneddtftvkvdgkeywtsrwnlqpllqsaqltgmtvtiksstce…	>stx2	15	AF524944	ATGAAGTGTATATTATTTAAATGGGTACTGTGCCTGTTACTGGGTTTTTCTTCGGTATCCTATTCCCGGGAATTTACGATAGACTTTTCGACTCAACAAAGTTATGTCTCTTCGTTAAATAGTATACGGACAGAGATATCGACCCCTCTTGAACATATATCTCAGGGGACCACATCGGTGTCTGTTATTAACCACACCCCGCCGGGCAGTTATTTTGCTGTGGATATACGAGGGCTTGATGTCTATCAGGCGCGTTTTGACCATCTTCGTCTGATTATTGAGCAAAATAATTTATATGTGGCCGGGTTCGTTAATACGGCAACAAATACTTTCTACCGTTTTTCAGATTTTACACATATATCAGTGCCCGATGTGACAACGGTTTCCATGACAACGGAC…
Stx2a-O178-TS22-08	16	FM998856	mkcilfkwvlclllgfssvsysreftidfstqqsyvsslnsirteistplehisqgttsvsvinhtppgsyfavdirgld vyqarfdhlrliieqnnlyvagfvntatntfyrfsdfthisvpdvttvsmttdssyttlqrvaalersgmqisrhslvss ylalmefsgntmtrdasravlrfvtvtaealrfrqiqrefrqalsetapvytmtpgdvdltlnwgrisnvlpeyrgedgv rvgrisfnnisailgtvavilnchhqgarsvravneesqpecqitgdrpvikinntlwesntaaaflnrksqflyttgkm kkmfmavlfalvsvnamaadcakgkiefskyneddtftvkvdgkeywtsrwnlqpllqsaqltgmtvtiksstce…	>stx2	16	FM998856	ATGAAGTGTATATTATTTAAATGGGTACTGTGCCTGTTACTGGGTTTTTCTTCGGTATCCTATTCCCGGGAATTTACGATAGACTTTTCGACTCAACAAAGTTATGTCTCTTCGTTAAATAGTATACGGACAGAGATATCGACCCCTCTTGAACATATATCTCAGGGGACCACATCGGTGTCTGTTATTAACCACACCCCGCCGGGCAGTTATTTTGCTGTGGATATACGAGGGCTTGATGTCTATCAGGCGCGTTTTGACCATCTTCGTCTGATTATTGAGCAAAATAATTTATATGTGGCCGGGTTCGTTAATACGGCAACAAATACTTTCTACCGTTTTTCAGATTTTACACATATATCAGTGCCCGATGTGACAACGGTTTCCATGACAACGGAC…
Stx2a-O22-EBC217	2	AY443054	mkcilfkwvlclllgfssvsysreftidfstqqsyvsslnsirteistplehisqgttsvsvinhtppgsyfavdirgld vyqarfdhlrliieqnnlyvagfvntatntfyrfsdfthisvpgvttvsmttdssyttlqrvaalersgmqisrhslvss ylalmefsgntmtrdasravlrfvtvtaealrfrqiqrefrqalsetapvytmtpgdvdltlnwgrisnvlpeyrgedgv rvgrisfnnisailstvavilnchhqgarsvravneesqpecqitgdrpvikinntlwesntaaaflnrksqflyttgkm kkmfmavlfalvsvnamaadcakgkiefskyneddtftvkvdgkeywtsrwnlqpllqsaqltgmtvtiksstce…	>stx2	2	AY443054	ATGAAGTGTATATTATTTAAATGGGTACTGTGCCTGTTACTGGGTTTTTCTTCGGTATCCTATTCCCGGGAGTTTACGATAGACTTTTCGACCCAACAAAGTTATGTCTCTTCGTTAAATAGTATACGGACAGAGATATCGACCCCTCTTGAACATATATCTCAGGGGACCACATCGGTGTCTGTTATTAACCACACCCCACCGGGCAGTTATTTTGCTGTGGATATACGAGGGCTTGATGTCTATCAGGCGCGTTTTGACCATCTTCGTCTGATTATTGAGCAAAATAATTTATATGTGGCCGGGTTCGTTAATACGGCAACAAATACTTTCTACCGTTTTTCAGATTTTACACATATATCAGTGCCCGGTGTGACAACGGTTTCCATGACAACGGAC…
Stx2a-O26-126814	14	AJ272135	mkcilfkwvlclllgfssvsysreftidfstqqsyvsslnsirteistplehisqgttsvsvinhtppgsyfavdirgld vyqarfdhlrliieqnnlyvagfvntatntfyrfsdfthisvpdvttvsmttdssyttlqrvaalersgmqisrhslvss ylalmefsgntmtrdasravlrfvtvtaealrfrqiqrefrqalsetapvytmtpgdvdltlnwgrisnvlpeyrgedgv rvgrisfnnisailgtvavilnchhqgarsvravneesqpecqitgdrpvikinntlwesntaaaflnrksqflyttgkm kkmfmavlfalvsvnamaadcakgkiefskyneddtftvkvdgeeywtsrwnlqpllqsaqltgmtvtiksstce…	>stx2	14	AJ272135	ATGAAGTGTATATTATTTAAATGGGTACTGTGCCTGTTACTGGGTTTTTCTTCGGTATCCTATTCCCGGGAATTTACGATAGACTTTTCGACTCAACAAAGTTATGTCTCTTCGTTAAATAGTATACGGACAGAGATATCGACCCCTCTTGAACATATATCTCAGGGGACCACATCGGTGTCTGTTATTAACCACACCCCGCCGGGCAGTTATTTTGCTGTGGATATACGAGGGCTTGATGTCTATCAGGCGCGTTTTGACCATCTTCGTCTGATTATTGAGCAAAATAATTTATATGTGGCCGGGTTCGTTAATACGGCAACAAATACTTTCTACCGTTTTTCAGATTTTACACATATATCAGTGCCCGATGTGACAACGGTTTCCATGACAACGGAC…
Stx2a-O26-FD930	23	AF461173	mkcilfkwvlclllgfssvsysreftidfstqqsyvsslnsirteistplehisqgttsvsvinhtppgsyfavdirgld vyqarfdhlrliieqnnlyvagfvntatntfyrfsdfthisvpgvttasmttdssyttlqrvaalersgmqisrhslvss ylalmefsgntmtrdasravlrfvtvtaealrfrqiqrefrqalsetapvytmtpgdvdltlnwgrisnvlpeyrgedgv rvgrisfnnisailgtvavilnchhqgarsvravneesqpecqitgdrpvikinntlwesntaaaflnrksqflyttgkm kkmfmavlfalasvnamaadcakgkiefskyneddtftvkvdgkeywtsrwnlrpllqsaqltgmtvtiksstce…	>stx2	23	AF461173	ATGAAGTGTATATTATTTAAATGGGTACTGTGCCTGTTACTGGGTTTTTCTTCGGTATCCTATTCCCGGGAGTTTACGATAGACTTTTCGACCCAACAAAGTTATGTCTCTTCGTTAAATAGTATACGGACAGAGATATCGACCCCTCTTGAACATATATCTCAGGGGACCACATCGGTGTCTGTTATTAACCACACCCCACCGGGCAGTTATTTTGCTGTGGATATACGAGGGCTTGATGTCTATCAGGCGCGTTTTGACCATCTTCGTCTGATTATTGAGCAAAATAATTTATATGTGGCCGGGTTCGTTAATACGGCAACAAATACTTTCTACCGTTTTTCAGATTTTACACATATATCAGTGCCCGGTGTGACAACGGCTTCCATGACAACGGAC…
Stx2a-O48-94C	10	Z37725	mkcilfkwvlclllgfssvsysreftidfstqqsyvsslnsirteistplehisqgttsvsvinhtppgsyfavdirgld vyqarfdhlrliieqnnlyvagfvntatntfyrfsdfthisvpdvttvsmttdssyttlqrvaalersgmqisrhslvss ylalmefsgntmtrdasravlrfvtvtaealrfrqiqrefrqalsetapvytmtpgdvdltlnwgrisnvlpeyrgedgv rvgrisfnnisailgtvavilnchhqgarsvravneesqpecqitgdrpvikinntlwesntaaaflnrksqflyttgkm kkmfmavlfalvsvnamaadcakgkiefskyneddtftvkvdgkeywtsrwnlqpllqsaqltgmtvtiksstce…	>stx2	10	Z37725	ATGAAGTGTATATTATTTAAATGGGTACTGTGCCTGTTACTGGGTTTTTCTTCGGTATCCTATTCCCGGGAGTTTACGATAGACTTTTCGACCCAACAAAGTTATGTCTCTTCGTTAAATAGTATACGGACAGAGATATCGACCCCTCTTGAACATATATCTCAGGGGACCACATCGGTGTCTGTTATTAACCACACCCCACCGGGCAGTTATTTTGCTGTGGATATACGAGGGCTTGATGTCTATCAGGCGCGTTTTGACCATCTTCGGCTGATTATTGAGCAAAATAATTTATATGTGGCCGGGTTCGTTAATACGGCAACAAATACTTTCTACCGTTTTTCAGATTTTACACATATATCAGTGCCCGATGTGACAACGGTTTCCATGACAACGGAC…
Stx2a-O71-STEC 440	137	MRVY01000159	mkcilfkwvlclllgfssvsysreftidfstqqsyvsslnsirteistplehisqgttsvsvinhtppgsyfavdirgld vyqarfdhlrliieqnnlyvagfvntatntfyrfsdfahisvpgvttvsmttdssyttlqrvaalersgmqisrhslvss ylalmefsgntmtrdasravlrfvtvtaealrfrqiqrefrqalsetapvytmtpgdvdltlnwgrisnvlpeyrgedgv rvgrisfnnisailgtvavilnchhqgarsvravnedsqpecqitgdrpvikinntlwesntaaaflnrksqflyttgkm kkmfmavlfalvsvnamaadcakgkiefskyneddtftvkvdgkeywtsrwnlqpllqsaqltgmtvtiksstce…	>stx2	137	MRVY01000159	atgaagtgtatattgtttaaatgggtactgtgcctgttactgggcttttcttcggtatcctattcacgggaatttacgatagacttttcgactcaacaaagttatgtatcttcgttaaatagtatacggacagagatatcgacccctcttgaacatatatctcaggggaccacatcggtgtctgttattaaccacaccccaccgggcagttattttgctgtggatatacgagggcttgatgtctatcaggcgcgttttgaccatcttcgtctgattattgagcaaaataatttatatgtggctgggttcgttaatacggcaacaaatactttctacagattttcagattttgcacatatatcagtgcccggtgtgacaacggtttccatgacaacggac…
Stx2a-O8-BMH-17-0027	130	MZ229605	mkcilfkwvlclllgfssvsysreytidfstqqsyvsslnsirtaistplehisqgttsvsvinhttpgsyfavdirgld vyqarfdhlrliieqnnlyvagfvntatntfyrfsdfthisvpgvttvsmttdssyttlqrvaaqersgmqinrhslvss ylalmefsgntmtrdasravlrfvtvtaealrfrqiqrefrqalsetapvytmtpgdvdltlnwgrisnvlpeyrgedgv rvgrisfnnisailgtvavilnchhqgtrsvravneesqpecqitgdrpvikinntlwesntaaaflnrksqslyttgem kkmfmavlfalvsvnamaadcakgkiefskyneddtftvkvdgkeywtsrwnlqpllqsaqltgmtvtiksstca…	>stx2	130	MZ229605	ATGAAGTGTATATTATTTAAATGGGTATTGTGCCTGTTACTGGGCTTTTCTTCGGTATCCTATTCCCGGGAATATACGATAGACTTTTCGACTCAACAAAGTTATGTCTCTTCGTTAAATAGTATACGGACAGCGATATCGACCCCTCTTGAACATATATCTCAGGGGACCACATCGGTGTCTGTTATTAACCACACCACACCGGGCAGTTATTTTGCTGTGGATATAAGAGGGCTTGATGTCTATCAGGCGCGTTTTGACCATCTTCGTCTGATTATTGAGCAAAATAATTTATATGTGGCCGGGTTCGTTAATACGGCAACAAATACTTTCTACCGTTTTTCAGATTTTACACATATATCAGTGCCCGGTGTGACAACTGTTTCCATGACAACGGAC…
Stx2a-O8-VTB178	19	AY633459	mkcilfkwvlclllgfssvsysreftidfstqqsyvsslnsirteistplehisqgttsvsvinhtppgsyfavdirgld vyqarfdhlrliieqnnlyvagfvntatntfyrfsdfthisvpgvttvsmttdssyttlqrvaalersgmqisrhslvss ylalmefsgntmtrdasravlrfvtvtaealrfrqiqrefrqalsetapvytmtpgdvdltlnwgrisnvlpeyrgedgv rvgrisfnnisailgtvavilnchhqgarsvravneesqpecqitgdrpvikinntlwesntaaaflnrksqslyttgem kkmfmavlfalvsvnamaadcakgkiefskyneddtftvkvdgkeywtsrwnlqpllqsaqltgmtvtiksstce…	>stx2	19	AY633459	ATGAAGTGTATATTATTTAAATGGGTACTGTGCCTGTTACTGGGTTTTTCTTCGGTATCCTATTCCCGGGAATTTACGATAGACTTTTCGACTCAACAAAGTTATGTCTCTTCGTTAAATAGTATACGGACAGAGATATCGACCCCTCTTGAACATATATCTCAGGGGACCACATCGGTGTCTGTTATTAACCACACCCCACCGGGCAGTTATTTTGCTGTGGATATACGAGGGCTTGATGTCTATCAGGCGCGTTTTGACCATCTTCGTCTGATTATTGAGCAAAATAATTTATATGTGGCCGGGTTCGTTAATACGGCAACAAATACTTTCTACCGTTTTTCAGATTTTACACATATATCAGTGCCCGGTGTGACAACGGTTTCCATGACAACGGAC…
Stx2a-ONT-23765	3	GQ429162	mkcilfkwvlclllgfssvsysreftidfstqqsyvsslnsirteistplehisqgttsvsvinhtppgsyfavdirgld vyqarfdhlrliieqnnlyvagfvntatntfyrfsdfthisvpgvttvsmttdssyttlqrvaalersgmqisrhslvss ylalmefsgntmtrdasravlrfvtvtaealrfrqiqrefrqvlsetapvytmtpgdvdltlnwgrisnvlpeyrgedgv rvgrisfnnisailstvavilnchhqgarsvravneesqpecqitgdrpvikinntlwesntaaaflnrksqflyttgkm kkmfmavlfalvsvnamaadcakgkiefskyneddtftvkvdgkeywtsrwnlqpllqsaqltgmtvtiksstce…	>stx2	3	GQ429162	ATGAAGTGTATATTATTTAAATGGGTACTGTGCCTGTTACTGGGTTTTTCTTCGGTATCCTATTCCCGGGAATTTACGATAGACTTTTCGACTCAACAAAGTTATGTCTCTTCGTTAAATAGTATACGGACAGAGATATCGACCCCTCTTGAACATATATCTCAGGGGACCACATCGGTGTCTGTTATTAACCACACCCCGCCGGGCAGTTATTTTGCTGTGGATATACGAGGGCTTGATGTCTATCAGGCGCGTTTTGACCATCTTCGTCTGATTATTGAGCAAAATAATTTATATGTGGCCGGGTTCGTTAATACGGCAACAAATACTTTCTACCGTTTTTCAGATTTTACACATATATCAGTGCCCGGTGTGACAACGGTTTCCATGACAACGGAC…
Stx2a-ONT-EBC210	22	AY443057	mkcilfkwvlclllgfssvsysreftidfstqqsyvsslnnirteistplehisqgttsvsvinhtppgsyfavdirgld vyqarfdhlrliieqnnlyvagfvntatntfyrfsdfthisvpgvttvsmttdssyttlqrvaalersgmqisrhspvss ylalmefsgntmtrdasravlrfvtvtaealrfrqiqrefrqalsetapvytmtpgdvdltlnwgrisnvlpeyrgedgv rvgrisfnnisailgtvavilnchhqgarsvravneesqpecqitgdrpvikinntlwesntaaaflnrksqflytmgkm kkmfmavlfalasvnamaadcakgkiefskyneddtftvkvdgkeywtsrwnlqpllqsaqltgmtvtiksstce…	>stx2	22	AY443057	ATGAAGTGTATATTATTTAAATGGGTACTGTGCCTGTTACTGGGTTTTTCTTCGGTATCCTATTCCCGGGAGTTTACGATAGACTTTTCGACCCAACAAAGTTATGTCTCTTCGTTAAATAATATACGGACAGAGATATCGACCCCTCTTGAACATATATCTCAGGGGACCACATCGGTGTCTGTTATTAACCACACCCCACCGGGCAGTTATTTTGCTGTGGATATACGAGGGCTTGATGTCTATCAGGCGCGTTTTGACCATCTTCGTCTGATTATTGAGCAAAATAATTTATATGTGGCCGGGTTCGTTAATACGGCAACAAATACTTTCTACCGTTTTTCAGATTTTACACATATATCAGTGCCCGGTGTGACAACGGTTTCCATGACAACGGAC…
Stx2b-O111-PH	96	L11078	mkcilfkwvlclllgfssvsysrefmidfstqqsyvsslnsirteistplehisqgttsvsvinhtppgsyfavdirgld vyqarfdhlrliieqnnlyvagfvntatntfyrfsdfthisvpgvttvsmttdssyttlqrvaalersgmqisrhslvss ylalmefsgntmtrdasravlrfvtvtaealrfrqiqrefrqalsetapvytmtpeevdltlnwgrisnvlpefrgeggv rvgrisfnnisailgtvavilnchhqgarsvravneeiqpecqitgdrpvirinntlwesntaaaflnrrahslntsgem kkifvaalfafvsvnamaadcpkgkiefskynendtftvkvagkeywtnrwnlqpllqsaqltgmtvtiksntca…	>stx2	96	L11078	ATGAAGTGTATATTATTTAAATGGGTACTGTGCCTGTTACTGGGTTTTTCTTCGGTATCCTATTCCCGGGAGTTTATGATAGACTTTTCGACCCAACAAAGTTATGTCTCTTCGTTAAATAGTATACGGACAGAGATATCGACCCCTCTTGAACATATATCTCAGGGGACCACATCGGTGTCTGTTATTAACCACACCCCACCGGGCAGTTATTTTGCTGTGGATATACGAGGGCTTGATGTCTATCAGGCGCGTTTTGACCATCTTCGTCTGATTATTGAGCAAAATAATTTATATGTGGCTGGGTTCGTTAATACGGCAACAAATACTTTCTACCGTTTTTCAGATTTTACACATATATCAGTGCCCGGTGTGACAACGGTTTCCATGACAACGGAC…
Stx2b-O111-S-1	88	AB012101	mkcillkwilclllgfssvsysreftidfstqqsyvsslnsirteistplehisqgttsvsvinhtppgsyfavdirgld vyqarfdhlrliiernnlyvagfvntatnifyrfsdfahisvpgvttvsmttdssyttlqrvaalersgmqisrhslvss ylalmefsgnamtrdasravlrfvtvtaealrfrqiqrefrlalsetapvytmtpeevdltlnwgrisnvlpefrgeggv rvgrisfnnisailgtvavilnchhqgarsvravneeiqpecqitgdrpvirinntlwesntaaaflnrrahslntsgem kkifvaalfafvsvnamaadcakgkiefskynendtftvkvagkeywtnrwnlqpllqsaqltgmtvtiksntca…	>stx2	88	AB012101	ATGAAGTGTATATTGTTAAAATGGATACTGTGCCTGTTGCTGGGCTTTTCTTCGGTATCCTATTCCCGGGAATTTACGATAGACTTTTCGACTCAACAAAGTTATGTCTCTTCGTTAAATAGTATACGGACAGAAATATCGACCCCACTTGAACATATATCTCAGGGGACCACATCGGTGTCTGTTATTAACCACACCCCACCGGGCAGTTATTTTGCTGTGGATATACGAGGGCTTGATGTCTATCAGGCGCGTTTTGACCATCTTCGTCTGATTATTGAGCGAAATAATTTATATGTGGCCGGATTCGTTAATACGGCAACAAATATTTTCTACAGATTTTCAGATTTTGCACATATATCAGTGCCCGGTGTGACAACTGTTTCCATGACAACGGAC…
Stx2b-O111-S-3	86	AB048223	mkcillkwilclllgfssvsysreftidfstqqsyvsslnsirteistplehisqgttsvsvinhtppgsyfavdirgld vyqarfdhlrliieqnnlyvagfvntatnifyrfsdfahisvpgvttvsmttdssyttlqrvaalersgmqisrhslvss ylalmefsgnamtrdasraalrfvtvtaealrfrqiqrefrlalsetapvytmtpeevdltlnwgrisnvlpefrgeggv rvgrisfnnisailgtvavilnchhqgarsvravneeiqpecqitgdrpvirinntlwesntaaaflnrrahslntsgem kkifvaalfafvsvnamaadcakgkiefskynendtftvkvagkeywtnrwnlqpllqsaqltgmtvtiksntca…	>stx2	86	AB048223	ATGAAGTGTATATTGTTAAAATGGATACTGTGCCTGTTGCTGGGCTTTTCTTCGGTATCCTATTCCCGGGAATTTACGATAGACTTTTCGACTCAACAAAGTTATGTCTCTTCGTTAAATAGTATACGGACAGAAATATCGACCCCACTTGAACATATATCTCAGGGGACCACATCGGTGTCTGTTATTAACCACACCCCACCGGGCAGTTATTTTGCTGTGGATATACGAGGGCTTGATGTCTATCAGGCGCGTTTTGACCATCTTCGTCTGATTATTGAGCAAAATAATTTATATGTGGCCGGATTCGTTAATACGGCAACAAATATTTTCTACAGATTTTCAGATTTTGCACATATATCAGTGCCCGGTGTGACAACTGTTTCCATGACAACGGAC…
Stx2b-O118-EH250	92	AF043627	mkcillkwvlclllgfssvsysreftidfstqqsyvsslncirteistplehisqgttsvsvinhtppgsyfavdirgld vyqarfdhlrliieqnnlyvagfvntatntfyrfsdfahisvpgvttvsmttdssyttlqrvaalersgmqisrhslvss ylalmefsgnamtrdasravlrfvtvtaealrfrqiqrefrlalsetapvytmtpeevdltlnwgrisnvlpefrgeggv rvgrisfnnisailgtvavilnchhqgarsvrsvneeiqpecqitgdrpvirlnntlwesntaaaflnrrahslntsgem kkifvaalfafvsvnamaadcakgkiefskynendtftvkvagkeywtnrwnlqpllqsaqltgmtvtiksntca…	>stx2	92	AF043627	ATGAAGTGTATATTGTTAAAATGGGTACTGTGCCTGTTACTGGGCTTTTCTTCGGTATCCTATTCCCGGGAATTTACGATAGACTTTTCGACTCAACAAAGTTATGTCTCTTCGTTAAATTGTATACGGACAGAAATATCGACCCCACTTGAACATATATCTCAGGGGACCACATCGGTATCTGTTATTAACCACACCCCACCGGGCAGTTATTTTGCTGTGGATATACGAGGGCTTGATGTCTATCAGGCGCGTTTTGACCATCTTCGTCTGATTATTGAGCAAAATAATTTATATGTGGCCGGATTCGTTAATACGGCAACAAATACTTTCTACAGATTTTCAGATTTTGCACATATATCAGTGCCCGGTGTGACAACTGTTTCCATGACAACGGAC…
Stx2b-O128-24196-97	95	AJ567995	mkcilfkwvlclllgfssvsysrefmidfstqqsyvsslnsirteistplehisqgttsvsvinhtppgsyfavdirgld vyqarfdhlrliieqnnlyvagfvntatntfyrfsdfthisvpgvttvsmttdssyttlqrvaalersgmqisrhslvss ylalmefsgntmtrdasravlrfvtvtaealrfrqiqrefrqalsetapvytmtpeevdltlnwgrisnvlpefrgeggv rvgrisfnnisailgtvavilnchhqgarsvravneeiqpecqitgdrpvirinntlwesntaaaflnrrahslntsgem kkifvaalfafvsvnamaadcakgkiefskynendtftvkvagkeywtnrwnlqpllqsaqltgmtvtiksntca…	>stx2	95	AJ567995	ATGAAGTGTATATTATTTAAATGGGTACTGTGCCTGTTACTGGGTTTTTCTTCGGTATCCTATTCCCGGGAGTTTATGATAGACTTTTCGACCCAACAAAGTTATGTCTCTTCGTTAAATAGTATACGGACAGAGATATCGACCCCTCTTGAACATATATCTCAGGGGACCACATCGGTGTCTGTTATTAACCACACCCCACCGGGCAGTTATTTTGCTGTGGATATACGAGGGCTTGATGTCTATCAGGCGCGTTTTGACCATCTTCGTCTGATTATTGAGCAAAATAATTTATATGTGGCTGGGTTCGTTAATACGGCAACAAATACTTTCTACCGTTTTTCAGATTTTACACATATATCAGTGCCCGGTGTGACAACGGTTTCCATGACAACGGAC…
Stx2b-O146-BMH-17-0036	131	MZ229607	mkcilfkwvlclllgfssvsysrefmidfstqqsyvsslnsirteistplehisqgttsvsiinhtppgsyfavdirgld vyqarfdhlrliieqnnlyvagfvntatntfyrfsdfthisvpgvttvsmttdssyttlqrvaalersgmqisrhslvss ylalmefsgntmtrdasravlrfvtvtaealrfrqiqrefrqalsetapvytmtpeevdltlnwgrisnvlpefrgeggv rvgrisfnnisailgtvavilnchhqgarsvravneeiqpecqitgdrpvirinntlwesntaaaflnrrahslntsgem kkifvaalfafvsvnamaadcakgkiefskynendtftvkvagkeywtnrwnlqpllqsaqltgmtvtiksntca…	>stx2	131	MZ229607	ATGAAGTGTATATTATTTAAATGGGTACTGTGCCTGTTACTGGGTTTTTCTTCGGTATCCTATTCCCGGGAGTTTATGATAGACTTTTCGACCCAACAAAGTTATGTCTCTTCGTTAAATAGTATACGGACAGAGATATCGACCCCTCTTGAACATATATCTCAGGGGACCACATCGGTGTCTATTATTAACCACACCCCACCGGGCAGTTATTTTGCTGTGGATATACGAGGGCTTGATGTCTATCAGGCGCGTTTTGACCATCTTCGTCTGATTATTGAGCAAAATAATTTATATGTGGCTGGGTTCGTTAATACGGCAACAAATACTTTCTACCGTTTTTCAGATTTTACACATATATCAGTGCCCGGTGTGACAACGGTTTCCATGACAACGGAC…
Stx2b-O174-031	97	X65949	mkcilfkwvlclllgfssvsysrefmidfstqqsyvsslnsirteistplehisqgttsvsvinhtppgsyfavdirgldvyqarfdhlrliieqnnlyvagfvntatntfyrfsdfthisvpgvttvsmttdssyttlqrvaalersgmqisrhslvssylalmefsgntmtrdasravlrfvtvtaealrfrqiqrefrqalsetapvytmtpeevdltlnwgrisnvlpefrgeggvrvgrisfnnisailgtvavilnchhqgarsvravneeiqpecqitgdrpvirinntlwesntaaaflnrrahslntsgemkkifvaalfafvsvnamaadcpkgkiefskynendtftvkvagkeywtnrwnlqpllqsaqltgmtvtiksntcasgsg…	>stx2	97	X65949	ATGAAGTGTATATTATTTAAATGGGTACTGTGCCTGTTACTGGGTTTTTCTTCGGTATCCTATTCCCGGGAGTTTATGATAGACTTTTCGACCCAACAAAGTTATGTCTCTTCGTTAAATAGTATACGGACAGAGATATCGACCCCTCTTGAACATATATCTCAGGGGACCACATCGGTGTCTGTTATTAACCACACCCCACCGGGCAGTTATTTTGCTGTGGATATACGAGGGCTTGATGTCTATCAGGCGCGTTTTGACCATCTTCGTCTGATTATTGAGCAAAATAATTTATATGTGGCTGGGTTCGTTAATACGGCAACAAATACTTTCTACCGTTTTTCAGATTTTACACATATATCAGTGCCCGGTGTGACAACGGTTTCCATGACAACGGAC…
Stx2b-O22-3143-97	91	AJ313015	mkcillkwvlclllgfssvsysreftidfstqqsyvsslnsirteistplehisqgttsvsvinhtppgsyfavdirgldvyqarfdhlrliieqnnlyvagfvntatntfyrfsdfahisvpgvttvsmttdssyttlqrvaalersgmqisrhslvssylalmefsgnamtrdasravlrfvtvtaealrfrqiqrefrlalsetapvytmtpeemdltlnwgrisnvlpefrgeggvrvgrisfnnisailgtvavilnchhqgarsvravneeiqpecqitgdrpvirinntlwesntaaaflnrrahslntsgemkkifvaalfafvsvnamaadcakgkiefskynendtftvkvagkeywtnrwnlqpllqsaqltgmtvtiksntcasgsg…	>stx2	91	AJ313015	atgaagtgtatattgttaaaatgggtactgtgcctgttactgggcttttcttcggtatcctattcccgggaatttacgatagacttttcgactcaacaaagttatgtctcttcgttaaatagtatacggacagaaatatcgactcctcttgagcatatatctcaggggaccacatcggtgtctgttattaaccacaccccaccgggcagttattttgctgtggatatacgagggcttgatgtctatcaggcgcgttttgaccatcttcgtctgattattgagcaaaataatttatatgtggccggatttgttaatacggcaacaaatactttctacagattttcagattttgcacatatatcagtgcccggtgtgacaactgtttccatgacaacggac…
Stx2b-O40-5293-98	93	AJ567997	mkcillkwvlclllgfssvsysreftidfstqqsyvsslnsirteistplehisqgttsvsvinhtppgsyfavdirgld vyqarfdhlrliieqnnlyvagfvntatntfyrfsdfahisvpgvttvsmttdssyttlqrvaalersgmqisrhslvss ylalmefsgnamtrdasravlrfvtvtaealrfrqiqrefrlalsetapvytmtpeevdltlnwgrisnvlpefrgeggv rvgrisfnnisailgtvavilnchhqgarsvravneeiqpecqitgdrpvirinntlwesntaaaflnrrahslntsgem kkifvaalfafvsvnamaadcakgkiefskynendtftvkvagkeywtnrwnlqpllqsaqltgmtvtiksntca…	>stx2	93	AJ567997	ATGAAGTGTATATTGTTAAAATGGGTACTGTGCCTGTTACTGGGCTTTTCTTCGGTATCCTATTCCCGGGAATTTACGATAGACTTTTCGACTCAACAAAGTTATGTCTCTTCGTTAAATAGTATACGGACAGAAATATCGACCCCACTTGAACATATATCTCAGGGGACCACATCGGTGTCTGTTATTAACCACACCCCACCGGGCAGTTATTTTGCTGTGGATATACGAGGGCTTGATGTCTATCAGGCGCGTTTTGACCATCTTCGTCTGATTATTGAGCAAAATAATTTATATGTGGCCGGATTCGTTAATACGGCAACAAATACTTTCTACAGGTTTTCAGATTTTGCACATATATCAGTGCCCGGTGTGACAACTGTTTCCATGACAACGGAC…
Stx2b-O8-S-9	83	AB048228	mkcillkwvlclllgfssvsysreftidfstqqsyvsslnsirteistplehisqgttsvsvinhtppgsyfavdirgld vyqarfdhlrliieqnnlyvagfvntatntfyrfsdfahisvpgvttvsmttdssyttlqrvaalersgmqisrhslvss ylalmefsgnamtrdasravlrfvtvtaealrfrqiqrefrlalsetapvytmtpeevdltlnwgrisnvlpefrgeggv rvgrisfnnisailgtvavilnchhqgarsvravneeiqpecqitgdrpvirinntlwesntaaaflnrrahslntsgem kkifvaalfafvsvnamaadcakgkiefskynendtftvkvagkeywtnrwnlqpllqgaqltgmtvtiksntca…	>stx2	83	AB048228	ATGAAGTGTATATTGTTAAAATGGGTACTGTGCCTGTTACTGGGCTTTTCTTCGGTATCCTATTCCCGGGAATTTACGATAGACTTTTCGACTCAACAAAGTTATGTCTCTTCGTTAAATAGTATACGGACAGAAATATCGACCCCACTTGAACATATATCTCAGGGGACCACATCGGTATCTGTTATTAACCACACCCCACCGGGCAGTTATTTTGCTGTGGATATACGAGGGCTTGATGTCTATCAGGCGCGTTTTGACCATCTTCGTCTGATTATTGAGCAAAATAATTTATATGTGGCCGGATTCGTTAATACGGCAACAAATACTTTCTACAGATTTTCAGATTTTGCACATATATCAGTGCCCGGTGTGACAACTGTTTCCATGACAACGGAC…
Stx2b-O96-S-10	87	AB048229	mkcillkwilclllgfssvsysreftidfstqqsyvsslnsirteistplehisqgttsvsvinhtppgsyfavdirgld vyqarfdhlrliieqnnlyvagfvntatnifyrfsdfahisvpgvttvsmttdssyttlqrvaalersgmqisrhslvss ylalmefsgnamtrdasravlrfvtvtaealrfrqiqrefrlalsetapvytmtpeevdltlnwgrisnvlpefrgeggv rvgrisfnnisailgtvavilnchhqgarsvravneeiqpecqitgdrpvirinntlwesntaaaflnrrahslntsgem kkifvaalfafvsvnamaadcakgkiefskynendtftvkvagkeywtnrwnlqpilqsaqltgmtvtiksntca…	>stx2	87	AB048229	ATGAAGTGTATATTGTTAAAATGGATACTGTGCCTGTTGCTGGGCTTTTCTTCGGTATCCTATTCCCGGGAATTTACGATAGACTTTTCGACTCAACAAAGTTATGTCTCTTCGTTAAATAGTATACGGACAGAAATATCGACCCCACTTGAACATATATCTCAGGGGACCACATCGGTGTCTGTTATTAACCACACCCCACCGGGCAGTTATTTTGCTGTGGATATACGAGGGCTTGATGTCTATCAGGCGCGTTTTGACCATCTTCGTCTGATTATTGAGCAAAATAATTTATATGTGGCCGGATTCGTTAATACGGCAACAAATATTTTCTACAGATTTTCAGATTTTGCACATATATCAGTGCCCGGTGTGACAACTGTTTCCATGACAACGGAC…
Stx2b-O96-S-6	90	AB048225	mkcillkwilclllgfssvsysreftidfstqqsyvsslnsirteistplehisqgttsvsvinhtppgsyfavdirgld vyqarfdhlrliieqnnlyvagfvntatnifyrfsdfahisvpgvttvsmttdssyttlqrvaalersgmqisrhslvss ylalmefsgnamtrdasravlrfvtvtaealrfrqiqrefrlalsetapvytmtpeevdltlnwgrisnvlpefrgeggv rvgrisfnnisailgtvavilnchhqgarsvravneeiqpecqitgdrpvirinntlwesntaaaflnrrahslntsgem kkifvaalfafvsvnamaadcakgkiefskynendtftvkvagkeywtnrwnlqpllqsaqltgmtvtiksntca…	>stx2	90	AB048225	ATGAAGTGTATATTGTTAAAATGGATACTGTGCCTGTTGCTGGGCTTTTCTTCGGTATCCTATTCCCGGGAATTTACGATAGACTTTTCGACTCAACAAAGTTATGTCTCTTCGTTAAATAGTATACGGACAGAAATATCGACCCCACTTGAACATATATCTCAGGGGACCACATCGGTGTCTGTTATTAACCACACCCCACCGGGCAGTTATTTTGCTGTGGATATACGAGGGCTTGATGTCTATCAGGCGCGTTTTGACCATCTTCGTCTGATTATTGAGCAAAATAATTTATATGTGGCCGGATTCGTTAATACGGCAACAAATATTTTCTACAGATTTTCAGATTTTGCACATATATCAGTGCCCGGTGTGACAACTGTTTCCATGACAACGGAC…
Stx2b-O96-S-7	89	AB048226	mkcillkwilclllgfssvsysreftidfstqqsyvsslnsirteistplehisqgttsvsvinhtppgsyfavdirgld vyrarfdhlrliieqnnlyvagfvntatnifyrfsdfahisvpgvttvsmttdssyttlqrvaalersgmqisrhslvss ylalmefsgnamtrdasravlrfvtvtaealrfrqiqrefrlalsetapvytmtpeevdltlnwgrisnvlpefrgeggv rvgrisfnnisailgtvavilnchhqgarsvravneeiqpecqitgdrpvirinntlwesntaaaflnrrahslntsgem kkifvaalfafvsvnamaadcakgkiefskynendtftvkvagkeywtnrwnlqpllqsaqltgmtvtiksntca…	>stx2	89	AB048226	ATGAAGTGTATATTGTTAAAATGGATACTGTGCCTGTTGCTGGGCTTTTCTTCGGTATCCTATTCCCGGGAATTTACGATAGACTTTTCGACTCAACAAAGTTATGTCTCTTCGTTAAATAGTATACGGACAGAAATATCGACCCCACTTGAACATATATCTCAGGGGACCACATCGGTGTCTGTTATTAACCACACCCCACCGGGCAGTTATTTTGCTGTGGATATACGAGGGCTTGATGTCTATCGGGCGCGTTTTGACCATCTTCGTCTGATTATTGAGCAAAATAATTTATATGTGGCCGGATTCGTTAATACGGCAACAAATATTTTCTACAGATTTTCAGATTTTGCACATATATCAGTGCCCGGTGTGACAACTGTTTCCATGACAACGGAC…
Stx2b-ONT-I7606	94	EF441616	mkcilfkwvlclllgfssvsysrefmidfstqqsyvsslnsirteistplehisqgttsvsvinhtppgsyfavdirgld vyqarfdhlrliieqnnlyvagfvntatntfyrfsdfthisvpgvttvsmttdssyttlqrvaalersgmqisrhslvss ylalmefsgntmtrdasravlrfvtvtaealrfrqierefrqalsetapvytmtpeevdltlnwgtisnvlpefrgeggv rvgrisfnnisailgtvavilnchhqgarsvravneeiqpecqitgdrpvirinntlwesntaaaflnrrahslntsmkk ifvaalfafvsvnamaadcakgkiefskynendtftvkvagkeywtnrwnlqpllqsaqltgmtvtiksntcasg…	>stx2	94	EF441616	ATGAAGTGTATATTATTTAAATGGGTACTGTGCCTGTTACTGGGTTTTTCTTCGGTATCCTATTCCCGGGAGTTTATGATAGACTTTTCGACCCAACAAAGTTATGTCTCTTCGTTAAATAGTATACGGACAGAGATATCGACCCCTCTTGAACATATATCTCAGGGGACCACATCGGTGTCTGTTATTAACCACACCCCACCGGGCAGTTATTTTGCTGTGGATATACGAGGGCTTGATGTCTATCAGGCGCGTTTTGACCATCTTCGTCTGATTATTGAGCAAAATAATTTATATGTGGCTGGGTTCGTTAATACGGCAACAAATACTTTCTACCGTTTTTCAGATTTTACACATATATCAGTGCCCGGTGTGACAACGGTTTCCATGACAACGGAC…
Stx2b-Out-HI-N	84	AB048238	mkcillkwvlclllgfssvsysreftidfstqqsyvsslnsirteistplehisqgttsvsvinhtppgsyfavdirgld vyqarfdhlrliieqnnlyvagfvntatntfyrfsdfahisvpgvttvsmttdssyttlqrvaalersgmqisrhslvss ylalmefggnamtrdasravlrfvtvtaealrfrqiqrefrlalsetapvytmtpeevdltlnwgrisnvlpefrgeggv rvgrisfnnisailgtvavilnchhqgarsvravneeiqpecqitgdrpvirinntlwesntaaaflnrrahslntsgem kkifvaalfafvsvnamaadcakgkiefskynendtftvkvagkeywtnrwnlqpllqsaqltgmtvtiksntca…	>stx2	84	AB048238	ATGAAGTGTATATTGTTAAAATGGGTACTGTGCCTGTTACTGGGCTTTTCTTCGGTATCCTATTCCCGGGAATTTACGATAGACTTTTCGACTCAACAAAGTTATGTCTCTTCGTTAAATAGTATACGGACAGAAATATCGACCCCACTTGAACATATATCTCAGGGGACCACATCGGTATCTGTTATTAACCACACCCCACCGGGCAGTTATTTTGCTGTGGATATACGAGGGCTTGATGTCTATCAGGCGCGTTTTGACCATCTTCGTCTGATTATTGAGCAAAATAATTTATATGTGGCCGGATTCGTTAATACGGCAACAAATACTTTCTACAGATTTTCAGATTTTGCACATATATCAGTGCCCGGTGTGACAACTGTTTCCATGACAACGGAC…
Stx2b-Out-S-4	82	AB012102	mkcillkwvlclllgfssvsysreftidfstqqsyvsslnsirteistplehisqgttsvsvinhtppgsyfavdirgld vyqarfdhlrliiernnlyvagfvntatntsyrfsdfahisvpgvttvsmttdssyttlqrvaalersgmqisrhslvss ylalmefsgnamtrdasravlrfvtvtaealrfrqiqrefrlalsetapvytmtpeeveltlnwgrisnvlpefrgeggv kmgrisfnnisailgtvavilnchhqgarsvravneeiqpecqitgdrpvirinntlwesntaaaflnrrahslntsgem kkifvaalfafvsvnamaadcakgkiefskynendtftvkvagkeywtnrwnlqpllqsaqltgmtvtiksntca…	>stx2	82	AB012102	ATGAAGTGTATATTGTTAAAATGGGTACTGTGCCTGTTACTGGGCTTTTCTTCGGTATCCTATTCCCGGGAATTTACGATAGACTTTTCGACTCAACAAAGTTATGTCTCTTCGTTAAATAGTATACGGACAGAAATATCGACCCCACTTGAACATATATCTCAGGGGACCACATCGGTATCTGTTATTAACCACACCCCACCGGGCAGTTATTTTGCTGTGGATATACGAGGGCTTGATGTCTATCAGGCGCGTTTTGACCATCTTCGTCTGATTATTGAGCGAAATAATTTATATGTGGCCGGATTCGTTAATACGGCAACAAATACTTCCTACAGATTTTCAGATTTTGCACATATATCAGTGCCCGGTGTGACAACTGTTTCCATGACAACGGAC…
Stx2c-O157-310	45	AY633467	mkcilfkwvlclllgffsvsysreftidfstqqsyvsslnsirteistplehisqgttsvsvinhtppgsyfavdirgld vyqarfdhlrliieqnnlyvagfvntatntfyrfsdfthisvpgvttvsmttdssyttlqrvaalersgmqisrhslvss ylalmefsgntmtrdasravlrfvtvtaealrfrqiqrefrqalsetapvytmtpgdvdltlnwgrisnvlpeyrgedgv rvgrisfnnisailgtvavilnchhqgarsvravnedsqpecqitgdrpvikinntlwesntaaaflnrksqflyttgkm kkmfmavlfalvsvnamaadcakgkiefskynendtftvkvagkeywtsrwnlqpllqsaqltgmtvtiksstce…	>stx2	45	AY633467	ATGAAGTGTATATTATTTAAATGGGTACTGTGCCTGTTACTGGGCTTTTTTTCGGTATCCTATTCCCGGGAATTTACGATAGACTTTTCGACTCAACAAAGTTATGTATCTTCGTTAAATAGTATACGGACAGAGATATCGACCCCTCTTGAACATATATCTCAGGGGACCACATCGGTGTCTGTTATTAACCACACCCCACCGGGCAGTTATTTTGCTGTGGATATACGAGGGCTTGATGTCTATCAGGCGCGTTTTGACCATCTTCGTCTGATTATTGAGCAAAATAATTTATATGTGGCCGGGTTCGTTAATACGGCAACAAATACTTTCTACCGTTTTTCAGATTTTACACATATATCAGTGCCCGGTGTGACAACGGTTTCCATGACAACGGAC…
Stx2c-O157-469	43	AY633473	mkcilfkwvlclllgfssvsssreftidfstqqsyvsslnsirteistplehisqgttsvsvinhtppgsyfavdirgld vyqarfdhlrliieqnnlyvagfvntatntfyrfsdfthisvpgvttvsmttdssyttlqrvaalersgmqisrhslvss ylalmefsgntmtrdasravlrfvtvtaealrfrqiqrefrqalsetapvytmtpgdvdltlnwgrisnvlpeyrgedgv rvgrisfnnisailgtvavilnchhqgarsvravnedsqpecqitgdrpvikinntlwesntaaaflnrksqflyttgkm kkmfmavlfalvsvnamaadcakgkiefskynendtftvkvagkeywtsrwnlqpllqsaqltgmtvtiksstce…	>stx2	43	AY633473	ATGAAGTGTATATTATTTAAATGGGTACTGTGCCTGTTACTGGGTTTTTCTTCGGTATCCTCTTCCCGGGAATTTACGATAGACTTTTCGACTCAACAAAGTTATGTATCTTCGTTAAATAGTATACGGACAGAGATATCGACCCCTCTTGAACATATATCTCAGGGGACCACATCGGTGTCTGTTATTAACCACACCCCACCGGGCAGTTATTTTGCTGTGGATATACGAGGGCTTGATGTCTATCAGGCGCGTTTTGACCATCTTCGTCTGATTATTGAGCAAAATAATTTATATGTGGCCGGGTTCGTTAATACGGCAACAAATACTTTCTACCGTTTTTCAGATTTTACACATATATCAGTGCCCGGTGTGACAACGGTTTCCATGACAACGGAC…
Stx2c-O157-A75	44	AY633453	mkcilfkwvlclllgffsvsssreftidfstqqsyvsslnsirteistplehisqgttsvsvinhtppgsyfavdirgld vyqarfdhlrliieqnnlyvagfvntatntfyrfsdfthisvpgvttvsmttdssyttlqrvaalersgmqisrhslvss ylalmefsgntmtrdasravlrfvtvtaealrfrqiqrefrqalsetapvytmtpgdvdltlnwgrisnvlpeyrgedgv rvgrisfnnisailgtvavilnchhqgarsvravnedsqpecqitgdrpvikinntlwesntaaaflnrksqflyttgkm kkmfmavlfalvsvnamaadcakgkiefskynendtftvkvagkeywtsrwnlqpllqsaqltgmtvtiksstce…	>stx2	44	AY633453	ATGAAGTGTATATTATTTAAATGGGTACTGTGCCTGTTACTGGGCTTTTTTTCGGTATCCTCTTCCCGGGAATTTACGATAGACTTTTCGACTCAACAAAGTTATGTATCTTCGTTAAATAGTATACGGACAGAGATATCGACCCCTCTTGAACATATATCTCAGGGGACCACATCGGTGTCTGTTATTAACCACACCCCACCGGGCAGTTATTTTGCTGTGGATATACGAGGGCTTGATGTCTATCAGGCGCGTTTTGACCATCTTCGTCTGATTATTGAGCAAAATAATTTATATGTGGCCGGGTTCGTTAATACGGCAACAAATACTTTCTACCGTTTTTCAGATTTTACACATATATCAGTGCCCGGTGTGACAACGGTTTCCATGACAACGGAC…
Stx2c-O157-C394-03	48	DQ235774	mkcilfkwvlclllgfssvsysreftidfstqqsyvsslnsirteistplehisqgttsvsvinhtppgsyfavdirgld vyqarfdhlrliieqnnlyvagfvntatntfyrfsdfthisvpgvttvsmttdssyttlqrvaalersgmqisrhslvss ylalmefsgntmtrdasravlrfvtvtaealrfrqiqrefrqalsetapvytmtpgdvdltlnwgrisnvlpeyrgedgv rvgrisfnnisailgtvavilnchhqgarsvravnedgqpecqitgdrpvikinntlwesntaaaflnrksqflyttgkm kkmfmavlfalvsvnamaadcakgkiefskynendtftvkvagkeywtsrwnlqpllqsaqltgmtvtiksstce…	>stx2	48	DQ235774	ATGAAGTGTATATTATTTAAATGGGTACTGTGCCTGTTACTGGGCTTTTCTTCGGTATCCTATTCCCGGGAATTTACGATAGACTTTTCGACTCAACAAAGTTATGTATCTTCGTTAAATAGTATACGGACAGAGATATCGACCCCTCTTGAACATATATCTCAGGGGACCACATCGGTGTCTGTTATTAACCACACCCCACCGGGCAGTTATTTTGCTGTGGATATACGAGGGCTTGATGTCTATCAGGCGCGTTTTGACCATCTTCGTCTGATTATTGAGCAAAATAATTTATATGTGGCCGGGTTCGTTAATACGGCAACAAATACTTTCTACCGTTTTTCAGATTTTACACATATATCAGTGCCCGGTGTGACAACGGTTTCCATGACAACGGAC…
Stx2c-O157-E32511	36	M59432	mkcilfkwvlclllgfssvsysreftidfstqqsyvsslnsirteistplehisqgttsvsvinhtppgsyfavdirgld vyqarfdhlrliieqnnlyvagfvntatntfyrfsdfthisvpgvttvsmttdssyttlqrvaalersgmqisrhslvss ylalmefsgntmtrdasravlrfvtvtaealrfrqiqrefrqalsetapvytmtpgdvdltlnwgrisnvlpeyrgedgv rvgrisfnnisailgtvavilnchhqgarsvravneesqpecqitgdrpvikinntlwesntaaaflnrksqflyttgkm kkmfmavlfalvsvnamaadcakgkiefskynendtftvkvagkeywtsrwnlqpllqsaqltgmtvtiksstce…	>stx2	36	M59432	ATGAAGTGTATATTATTTAAATGGGTACTGTGCCTGTTACTGGGCTTTTCTTCGGTATCCTATTCCCGGGAATTTACGATAGACTTTTCGACTCAACAAAGTTATGTATCTTCGTTAAATAGTATACGGACAGAGATATCGACCCCTCTTGAACATATATCTCAGGGGACCACATCGGTGTCTGTTATTAACCACACCCCACCGGGCAGTTATTTTGCTGTGGATATACGAGGGCTTGATGTCTATCAGGCGCGTTTTGACCATCTTCGTCTGATTATTGAGCAAAATAATTTATATGTGGCCGGGTTCGTTAATACGGCAACAAATACTTTCTACCGTTTTTCAGATTTTACACATATATCAGTGCCCGGTGTGACAACGGTTTCCATGACAACGGAC…
Stx2c-O157-FLY16	52	AB015057	mkcilfkwvlclllgfssvsysreftidfstqqsyvsslnsirteistplehisqgttsvsvinhtppgsyfavdirgld vyqarfdhlrliieqnnlyvagfvntatntfyrfsdfthisvpgvttvsmttdssyttlqrvaalersgmqisrhslvss ylalmefsgntmtrdasravlrfvtvtaealrfrqiqrefrqalsetapvytmtpgdvdltlnwgrisnvlpeyrgedgv rvgrisfnnisailgtvavilnchhqgarsvravnedsqpecqitgdrpvikinntlwesntaaaflnrksqflyttgkm kkmfmavlfalvsvnamaadcakgkiefskynendtftvkvagkeywtsrwnlqpllqsaqltgmtvtiksstce…	>stx2	52	AB015057	ATGAAGTGTATATTATTTAAATGGGTACTGTGCCTGTTACTGGGCTTTTCTTCGGTATCCTATTCCCGGGAATTTACGATAGACTTTTCGACTCAACAAAGTTATGTATCTTCGTTAAATAGTATACGGACAGAGATATCGACCCCTCTTGAACATATATCTCAGGGGACCACATCGGTGTCTGTTATTAACCACACCCCACCGGGCAGTTATTTTGCTGTGGATATACGAGGGCTTGATGTCTATCAGGCGCGTTTTGACCATCTTCGTCTGATTATTGAGCAAAATAATTTATATGTGGCCGGGTTCGTTAATACGGCAACAAATACTTTCTACCGTTTTTCAGATTTTACACATATATCAGTGCCCGGTGTGACAACGGTTTCCATGACAACGGAC…
Stx2c-O157-G5101	33	EF441604	mkcilfkwvlclllgfssvsysreftidfstqqsyvsslnsirteistplehisqgttsvsvinhtppgsyfavdirgld vyqarfdhlrliieqnnlyvagfvntatntfyrfsdfthisvpsvttvsmttdssyttlqrvaalersgmqisrhslvss ylalmefsgntmtrdasravlrfvtvtaealrfrqiqrefrqalsetapvytmtpgdvdltlnwgrisnvlpeyrgedgv rvgrisfnnisailgtvavilnchhqgarsvravneesqpecqitgdrpvikinntlwesntaaaflnrksqflyttgkm kkmfmavlfalvsvnamaadcakgkiefskynendtftvkvagkeywtsrwnlqpllqsaqltgmtvtiksstce…	>stx2	33	EF441604	ATGAAGTGTATATTATTTAAATGGGTACTGTGCCTGTTACTGGGTTTTTCTTCGGTATCCTATTCCCGGGAGTTTACGATAGACTTTTCGACCCAACAAAGTTATGTCTCTTCGTTAAATAGTATACGGACAGAGATATCGACCCCTCTTGAACATATATCTCAGGGGACCACATCGGTGTCTGTTATTAACCACACCCCACCGGGCAGTTATTTTGCTGTGGATATACGAGGGCTTGATGTCTATCAGGCGCGTTTTGACCATCTTCGTCTGATTATTGAGCAAAATAATTTATATGTGGCCGGGTTCGTTAATACGGCAACAAATACTTTCTACCGTTTTTCAGATTTTACACATATATCAGTGCCCAGTGTGACAACGGTTTCCATGACAACGGAC…
Stx2c-O157-V20	49	AB071845	mkcilfkwvlclllgfssvsysreftidfstqqsyvsslnsirteistplehisqgttsvsvinhtppgsyfavdirgld vyqarfdhlrliieqnnlyvagfvntatntfyrfsdfthisvpgvttvsmttdssyttlqrvaalersgmqisrhslvss ylalmefsgntmtrdasravlrfvtvtaqallfrqiqrefrqalsetapvytmtpgdvdltlnwgrisnvlpeyrgedgv rvgrisfnnisailgtvavilnchhqgarsvravnedsqpecqitgdrpvikinntlwesntaaaflnrksqflyttgkm kkmfmavlfalvsvnamaadcakgkiefskynendtftvkvagkeywtsrwnlqpllqsaqltgmtvtiksstce…	>stx2	49	AB071845	ATGAAGTGTATATTATTTAAATGGGTACTGTGCCTGTTACTGGGCTTTTCTTCGGTATCCTATTCCCGGGAATTTACGATAGACTTTTCGACTCAACAAAGTTATGTATCTTCGTTAAATAGTATACGGACAGAGATATCGACCCCTCTTGAACATATATCTCAGGGGACCACATCGGTGTCTGTTATTAACCACACCCCACCGGGCAGTTATTTTGCTGTGGATATACGAGGGCTTGATGTCTATCAGGCGCGTTTTGACCATCTTCGTCTGATTATTGAGCAAAATAATTTATATGTGGCCGGGTTCGTTAATACGGCAACAAATACTTTCTACCGTTTTTCAGATTTTACACATATATCAGTGCCCGGTGTGACAACGGTTTCCATGACAACGGAC…
Stx2c-O157-Y350	51	AF291819	mkrilfkwvlclllgfssvsysreftidfstqqsyvsslnsirteistplehisqgttsvsvinhtppgsyfavdirgld vyqarfdhlrliieqnnlyvagfvntatntfyrfsdfthisvpgvttvsmttdssyttlqrvaalersgmqisrhslvss ylalmefsgntmtrdasravlrfvtvtaealrfrqiqrefrqalsetapvytmtpgdvdltlnwgrisnvlpeyrgedgv rvgrisfnnisailgtvavilnchhqgarsvravnedsqpecqitgdrpvikinntlwesntaaaflnrksqflyttgkm kkmfmavlfalvsvnamaadcakgkiefskynendtftvkvagkeywtsrwnlqpllqsaqltgmtvtiksstce…	>stx2	51	AF291819	ATGAAGCGTATATTATTTAAATGGGTACTGTGCCTGTTACTGGGCTTTTCTTCGGTATCCTATTCCCGGGAATTTACGATAGACTTTTCGACTCAACAAAGTTATGTATCTTCGTTAAATAGTATACGGACAGAGATATCGACCCCTCTTGAACATATATCTCAGGGGACCACATCGGTGTCTGTTATTAACCACACCCCACCGGGCAGTTATTTTGCTGTGGATATACGAGGGCTTGATGTCTATCAGGCGCGTTTTGACCATCTTCGTCTGATTATTGAGCAAAATAATTTATATGTGGCCGGGTTCGTTAATACGGCAACAAATACTTTCTACCGTTTTTCAGATTTTACACATATATCAGTGCCCGGTGTGACAACGGTTTCCATGACAACGGAC…
Stx2c-O163-NS-P065	139	BGEN01000020.1	mkcilfkwvlclllgfssvsysreftidfstqqsyvsslnsirteistplehisqgttsvsvinhtppgsyfavdirgld vyqarfdhlrliieqnnlyvagfvntatntfyrfsdfthisvpdvttvsmttdssyttlqrvaalersgmqisrhslvss ylalmefsgntmtrdasravlrfvtvtaealrfrqiqrefrqalsetapvytmtpgdvdltlnwgrisnvlpeyrgedgv rvgrisfnnisailgtvavilnchhqgarsvravneesqpecqitgdrpvikinntlwesntaaaflnrksqflyttgkm kkmfmavlfalvsvnamaadcakgkiefskynendtftvkvagkeywtsrwnlqpllqsaqltgmtvtiksstce…	>stx2	139	BGEN01000020.1	atgaagtgtatattatttaaatgggtactgtgcctgttactgggtttttcttcggtatcctattcccgggaatttacgatagacttttcgactcaacaaagttatgtctcttcgttaaatagtatacggacagagatatcgacccctcttgaacatatatctcaggggaccacatcggtgtctgttattaaccacaccccgccgggcagttattttgctgtggatatacgagggcttgatgtctatcaggcgcgttttgaccatcttcgtctgattattgagcaaaataatttatatgtggccgggttcgttaatacggcaacaaatactttctaccgtttttcagattttacacatatatcagtgcccgatgtgacaacggtttccatgacaacggac…
Stx2c-O171-EBC287	53	AY443045	mkcillkwvlclllgfssvsysreftidfstqqsyvsslnsirteistplehisqgttsvsvinhtppgsyfavdirgld vyqarfdhlrliieqnnlyvagfvntatntfyrfsdfthisvpgvttvsmttdssyttlqrvaalersgmqisrhslvss ylalmefsgntmtrdasravlrfvtvtaealrfrqiqrefrqalsetapvytmtpgdvdltlnwgrisnvlpeyrgedgv rvgrisfnnisailgtvavilnchhqgarsvravnedsqpecqitgdrpvikinntlwesntaaaflnrksqflyttgkm kkmfmavlfalvsvnamaadcakgkiefskynendtftvkvagkeywtsrwnlqpllqsaqltgmtvtiksstce…	>stx2	53	AY443045	ATGAAGTGTATATTGTTAAAATGGGTACTGTGCCTGTTACTGGGCTTTTCTTCGGTATCCTATTCCCGGGAATTTACGATAGACTTTTCGACTCAACAAAGTTATGTCTCTTCGTTAAATAGTATACGGACAGAGATATCGACCCCTCTTGAACATATATCTCAGGGGACCACATCGGTGTCTGTTATTAACCACACCCCACCGGGCAGTTATTTTGCTGTGGATATACGAGGGCTTGATGTCTATCAGGCGCGTTTTGACCATCTTCGTCTGATTATTGAGCAAAATAATTTATATGTGGCCGGGTTCGTTAATACGGCAACAAATACTTTCTACCGTTTTTCAGATTTTACACATATATCAGTGCCCGGTGTGACAACGGTTTCCATGACAACGGAC…
Stx2c-O174-031	35	L11079	mkcilfkwvlclllgfpsvsysrefmidfstqqsyvsslnsirteistplehisqgttsvsvinhtppgsyfavdirgld vyqarfdhlrliieqnnlyvagfvntatntfyrfsdfthisvpgvttvsmttdssyttlqrvaalersgmqisrhslvss ylalmefsgntmtrdasravlrfvtvtaealrfrqiqrefrqalsetapvytmtpgdvdltlnwgrisnvlpeyrgedgv rvgrisfnnisailgtvavilnchhqgarsvravneesqpecqitgdrpvikinntlwesntaaaflnrksqflyttgkm kkmfmavlfalvsvnamaadcakgkiefskynendtftvkvagkeywtsrwnlqpllqsaqltgmtvtiksstce…	>stx2	35	L11079	ATGAAGTGTATATTATTTAAATGGGTACTGTGCCTGTTACTGGGTTTTCCTTCGGTATCCTATTCCCGGGAGTTTATGATAGACTTTTCGACCCAACAAAGTTATGTCTCTTCGTTAAATAGTATACGGACAGAGATATCGACCCCTCTTGAACATATATCTCAGGGGACCACATCGGTGTCTGTTATTAACCACACCCCACCGGGCAGTTATTTTGCTGTGGATATACGAGGGCTTGATGTCTATCAGGCGCGTTTTGACCATCTTCGTCTGATTATTGAGCAAAATAATTTATATGTGGCTGGGTTCGTTAATACGGCAACAAATACTTTCTACCGTTTTTCAGATTTTACACATATATCAGTGCCCGGTGTGACAACGGTTTCCATGACAACGGAC…
Stx2c-O177-06-5121	40	EU086525	mkcilfkwvlclllgfssvsysreftidfstqqsyvsslnsirteistplehisqgttsvsvinhtppgsyfavdirgld vyqarfdhlrliieqnnlyvagfvntatntfyrfsdfahisvpgvttvsmttdssyttlqrvaalersgmqisrhslvss ylalmefsgntmtrdasravlrfvtvtaealrfrqiqrefrqalsetapvytmtpgdvdltlnwgrisnvlpeyrgedgv rvgrisfnnisailgtvavilnchhqgarsvravnedsqpecqitgdrpvikinntlwesntaaaflnrksqflyttgkm kkmfmavlfalvsvnamaadcakgkiefskynendtftvkvagkeywtsrwnlqpllqsaqltgmtvtiksstce…	>stx2	40	EU086525	ATGAAGTGTATATTGTTTAAATGGGTACTGTGCCTGTTACTGGGCTTTTCTTCGGTATCCTATTCACGGGAATTTACGATAGACTTTTCGACTCAACAAAGTTATGTATCTTCGTTAAATAGTATACGGACAGAGATATCGACCCCTCTTGAACATATATCTCAGGGGACCACATCGGTGTCTGTTATTAACCACACCCCACCGGGCAGTTATTTTGCTGTGGATATACGAGGGCTTGATGTCTATCAGGCGCGTTTTGACCATCTTCGTCTGATTATTGAGCAAAATAATTTATATGTGGCTGGGTTCGTTAATACGGCAACAAATACTTTCTACAGATTTTCAGATTTTGCACATATATCAGTGCCCGGTGTGACAACGGTTTCCATGACAACGGAC…
Stx2c-O177-CB7126	37	FM177471	mkcilfkwvlclllgfssvsysreftidfstqqsyvsslnsirteistplehisqgttsvsvinhtppgsyfavdirgld vyqarfdhlrliieqnnlyvagfvntatntfyrfsdfahisvpgvttvsmttdssyttlqrvaalersgmqisrhslvss ylalmefsgntmtrdasravlrfvtvtaealrfrqiqrefrqalsetapvytmtpgdvdltlnwgrisnvlpeyrgedgv rvgrisfnnisailgtvavilnchhqgarsvravneesqpecqitgdrpvikinntlwesntaaaflnrksqflyttgkm kkmfmavlfalvsvnamaadcakgkiefskynendtftvkvagkeywtsrwnlqpllqsaqltgmtvtiksstce…	>stx2	37	FM177471	ATGAAGTGTATATTATTTAAATGGGTACTGTGCCTGTTACTGGGCTTTTCTTCGGTATCCTATTCCCGGGAATTTACGATAGACTTTTCGACTCAACAAAGTTATGTATCTTCGTTAAATAGTATACGGACAGAGATATCGACCCCTCTTGAACATATATCTCAGGGGACCACATCGGTGTCTGTTATTAACCACACCCCACCGGGCAGTTATTTTGCTGTGGATATACGAGGGCTTGATGTCTATCAGGCGCGTTTTGACCATCTTCGTCTGATTATTGAGCAAAATAATTTATATGTGGCCGGGTTCGTTAATACGGCAACAAATACTTTCTACAGATTTTCAGATTTTGCACATATATCAGTGCCCGGTGTGACAACGGTTTCCATGACAACGGAC…
Stx2c-O178-SI-P079	141	BGJH01000123	mkcilfkwvlclllgfssvsysreftidfstqqsyvsslnsirteistplehisqgttsvsvinhtppgsyfavdirgld vyqarfdhlrliieqnnlyvagfvntatntfyrfsdfthisvpgvttvsmttdssyttlqrvaalersgmqisrhslvss ylalmefsgntmtrdasravlrfvtvtaealrfrqiqrefrqalsetapvytmtpgdvdltlnwgrisnvlpeyrgedgv rvgrisfnnisailgtvavilnchhqgarsvravneesqpecqitgdrpvikinntlwgsntaaaflnrksqflyttgkm kkmfmavlfalvsvnamaadcakgkiefskynendtftvkvagkeywtsrwnlqpllqsaqltgmtvtiksstce…	>stx2	141	BGJH01000123	atgaagtgtatattatttaaatgggtactgtgcctgttactgggtttttcttcggtatcctattcccgggaatttacgatagacttttcgactcaacaaagttatgtctcttcgttaaatagtatacggacagagatatcgacccctcttgaacatatatctcaggggaccacatcggtgtctgttattaaccacaccccgccgggcagttattttgctgtggatatacgagggcttgatgtctatcaggcgcgttttgaccatcttcgtctgattattgagcaaaataatttatatgtggccgggttcgttaatacggcaacaaatactttctaccgtttttcagattttacacatatatcagtgcccggtgtgacaacggtttccatgacaacggac…
Stx2c-O21-TzEc033	138	WSHT01000077	mkcilfkwvlclllgfssvsysreftidfstqqsyvsslnsirteistplehisqgttsvsvinhtppgsyfavdirgld vyqarfdhlrliieqnnlyvagfvntatntfyrfsdfthisvpgvttvsmttdssyttlqrvaalersgmqisrhslvss ylalmefsgntmtrdasravlrfvtvtaealrfrqiqrefrqalsetapvytmtpgdvdltlnwgrisnvlpeyrgedgv rvgrisfnnisailstvavilnchhqgarsvravneesqpecqitgdrpvikinntlwesntaaaflnrksqflyttgem kkmfmavlfalvsvnamaadcakgkiefskynendtftvkvagkeywtsrwnlqpllqsaqltgmtvtiksstce…	>stx2	138	WSHT01000077	atgaagtgtatattatttaaatgggtactgtgcctgttactgggcttttcttcggtatcctattcccgggaatttacgatagacttttcgactcaacaaagttatgtctcttcgttaaatagtatacggacagagatatcgacccctcttgaacatatatctcaggggaccacatcggtgtctgttattaaccacaccccgccgggcagttattttgctgtggatatacgagggcttgatgtctatcaggcgcgttttgaccatcttcgtctgattattgagcaaaataatttatatgtggccgggttcgttaatacggcaacaaatactttctaccgtttttcagattttacacatatatcagtgcccggtgtgacaacggtttccatgacaacggac…
Stx2c-O22-FWSEC0555	146	RRSO01000070	mkcilfkwvlclllgfssvsysreftidfstqqsyvsslnsirteistplehisqgttsvsvinhtppgsyfavdirgld vyqarfdhlrliieqnnlyvagfvntatntfyrfsdfthisvpgvttvsmttdssyttlqrvaalersgmqisrhslvss ylalmefsgntmtrdasravlrfvtvtaealrfrqiqrefrqalsetapvytmtpgdvdltlnwgrisnvlpeyrgedgv rvgrisfnnisailstvavilnchhqgarsvravneesqpecqitgdrpvikinntlwesntaaaflnrksqflyttgkm kkmfmavlfalvsvnamaadcakgkiefskynendtftvkvagkeywtsrwnlqpllqsaqltgmtvtiksstce…	>stx2	146	RRSO01000070	atgaagtgtatattatttaaatgggtactgtgcctgttactgggtttttcttcggtatcctattcccgggagtttacgatagacttttcgacccaacaaagttatgtctcttcgttaaatagtatacggacagagatatcgacccctcttgaacatatatctcaggggaccacatcggtgtctgttattaaccacaccccaccgggcagttattttgctgtggatatacgagggcttgatgtctatcaggcgcgttttgaccatcttcgtctgattattgagcaaaataatttatatgtggccgggttcgttaatacggcaacaaatactttctaccgtttttcagattttacacatatatcagtgcccggtgtgacaacggtttccatgacaacggac…
Stx2c-O28ac-NS-P024	140	BGDW01000072	mkcilfkwvlclllgfssvsysreftidfstqqsyvsslnsirteistplehisqgttsvsvinhtppgsyfavdirgld vyqarfdhlrliieqnnlyvagfvntatntfyrfsdfthisvpgvttvsmttdssyttlqrvaalersgmqisrhslvss ylalmefsgntmtrdasravlrfvtvtaealrfrqiqrefrqalsetapvytmtpgdvdltlnwgrisnvlpeyrgedgv rvgrisfnnisailgtvavilnchhqgarsvravneesqpecqitgdrpvikinntlwgsntaaaflnrksqflyttgkm kkmfmavlfalvsvnamaadcakgkiefskynendtftvkvagkeywtsrwnlqpllqsahltgmtvtiksstce…	>stx2	140	BGDW01000072	atgaagtgtatattatttaaatgggtactgtgcctgttactgggtttttcttcggtatcctattcccgggaatttacgatagacttttcgactcaacaaagttatgtctcttcgttaaatagtatacggacagagatatcgacccctcttgaacatatatctcaggggaccacatcggtgtctgttattaaccacaccccgccgggcagttattttgctgtggatatacgagggcttgatgtctatcaggcgcgttttgaccatcttcgtctgattattgagcaaaataatttatatgtggccgggttcgttaatacggcaacaaatactttctaccgtttttcagattttacacatatatcagtgcccggtgtgacaacggtttccatgacaacggac…
Stx2c-O28ac-OU-P061	136	BGGH01000007	mkcilfkwvlclllgfssvsysreftidfstqqsyvsslnsirteistplehisqgttsvsvinhtppgsyfavdirgld vyqarfdhlrliieqnnlyvagfvntatntfyrfsdfthisvpgvttvsmttdssyttlqrvaalerfgmqisrhslvss ylalmefsgntmtrdasravlrfvtvtaealrfrqiqrefrqalsetapvytmtpgdvdltlnwgrisnvlpeyrgedgv rvgrisfnnisailgtvavilnchhqgarsvravneesqpecqitgdrpvikinntlwgsntaaaflnrksqflyttgkm kkmfmavlfalvsvnamaadcakgkiefskynendtftvkvagkeywtsrwnlqpllqsaqltgmtvtiksstce…	>stx2	136	BGGH01000007	atgaagtgtatattatttaaatgggtactgtgcctgttactgggtttttcttcggtatcctattcccgggaatttacgatagacttttcgactcaacaaagttatgtctcttcgttaaatagtatacggacagagatatcgacccctcttgaacatatatctcaggggaccacatcggtgtctgttattaaccacaccccgccgggcagttattttgctgtggatatacgagggcttgatgtctatcaggcgcgttttgaccatcttcgtctgattattgagcaaaataatttatatgtggccgggttcgttaatacggcaacaaatactttctaccgtttttcagattttacacatatatcagtgcccggtgtgacaacggtttccatgacaacggac…
Stx2c-O74-CFSAN026781	144	LGZW01000080	mkcilfkwvlclllgfssvsysreftidfstqqsyvsslnsirteistplehisqgttsvsvinhtppgsyfavdirgld vyqarfdhlrliieqnnlymagfvntatntfyrfsdfthisvpdvttvsmttdssyttlqrvaalersgmqisrhslvss ylalmefsgntmtrdasravlrfvtvtaealrfrqiqrefrqalsetapvytmtpgdvdltlnwgrisnvlpeyrgedgv rvgrisfnnisailgtvavilnchhqgarsvravneesqpecqitgdrpvikinntlwesntaaaflnrksqflyttgkm kkmfmavlfalvsvnamaadcakgkiefskynendtftvkvagkeywtsrwnlqpllqsaqltgmtvtiksstce…	>stx2	144	LGZW01000080	atgaagtgtatattatttaaatgggtactgtgcctgttactgggtttttcttcggtatcctattcccgggaatttacgatagacttttcgactcaacaaagttatgtctcttcgttaaatagtatacggacagagatatcgacccctcttgaacatatatctcaggggaccacatcggtgtctgttattaaccacaccccgccgggcagttattttgctgtggatatacgagggcttgatgtctatcaggcgcgttttgaccatcttcgtctgattattgagcaaaataatttatatatggccgggttcgttaatacggcaacaaatactttctaccgtttttcagattttacacatatatcagtgcccgatgtgacaacggtttccatgacaacggac…
Stx2c-ONT-EBC219	39	AY443043	mkcillkwvlclllgfssvsysreftidfstqqsyvsslnsirteistplehisqgttsvsvinhtppgsyfavdirgld vyqarfdhlrliieqnnlyvagfvntatntfyrfsdfahisvpgvttvsmttdssyttlqrvaalersgmqisrhslvss ylalmefsgntmtrdasravlrfvtvtaealrfrqiqrefrqalsetapvytmtpgdvdltlnwgrisnvlpeyrgedgv gvgrisfnnisailgtvavilnchhqgarsvravneesqpecqitgdrpvikinntlwesntaaaflnrksqflyttgkm kkmfmavlfalvsvnamaadcakgkiefskynendtftvkvagkeywtsrwnlqpllqsaqltgmtvtiksstce…	>stx2	39	AY443043	ATGAAGTGTATATTGTTAAAATGGGTACTGTGCCTGTTACTGGGCTTTTCTTCGGTATCCTATTCCCGGGAATTTACGATAGACTTTTCGACTCAACAAAGTTATGTCTCTTCGTTAAATAGTATACGGACAGAAATATCGACCCCACTTGAACATATATCTCAGGGGACCACATCGGTGTCTGTTATTAACCACACCCCACCGGGCAGTTATTTTGCTGTGGATATACGAGGGCTTGATGTCTATCAGGCGCGTTTTGACCATCTTCGTCTGATTATTGAGCAAAATAATTTATATGTGGCCGGGTTCGTTAATACGGCAACAAATACTTTCTACAGATTTTCAGATTTTGCACATATATCAGTGCCCGGTGTGACAACTGTTTCCATGACAACGGAC…
Stx2c-ONT-EBC289	55	AY443049	mkcilfkwvlclllgfstvsysreftidfstqqsyvsslntirteistplehisqgttsvsvinhtppgsyfavdirgld vyqarfdhlrliieqnnlyvagfvntatntfyrfsdfthisvpgvttvsmttdssyttlqrvaalersgmqisrhslvss ylalmefsgntmtrdasravlrfvtvtaealrfwqiqrefrqalsetdpvytmtpgdvdltlnwgrisnvlpeyrgedgv rvgrisfnnisailgtvavilnchhqgarsvravnedsqpecqitgdrpvikinntlwesntaaaflnrksqflyttgkm kkmfmavlfalvsvnamaadcakgkiefskynendtftvkvagkeywtsrwnlqpllqsaqltgmtvtiksstce…	>stx2	55	AY443049	ATGAAGTGTATATTATTTAAATGGGTACTGTGCCTGTTACTGGGTTTTTCTACGGTATCCTATTCCCGGGAGTTTACGATAGACTTTTCGACCCAACAAAGTTATGTCTCTTCGTTAAATACTATACGGACAGAAATATCGACTCCTCTTGAGCATATATCTCAGGGGACCACATCGGTGTCTGTTATTAACCACACCCCACCGGGCAGTTATTTTGCTGTGGATATACGAGGGCTTGATGTCTATCAGGCGCGTTTTGACCATCTTCGTCTGATTATTGAGCAAAATAATTTATATGTGGCCGGGTTCGTTAATACGGCAACAAATACTTTCTACCGTTTTTCAGATTTTACACATATATCAGTGCCCGGTGTGACAACGGTTTCCATGACAACGGAC…
Stx2c-OR-TS27-08	56	FM998860	mkcilfkwvlclllgfssvsysreftidfstqqsyvsslntirteistplehisqgttsvsvinhtppgsyfavdirgld vyqarfdhlrliieqnnlyvagfvntatntfyrfsdfthisvpgvttvsmttdssyttlqrvaalersgmqisrhslvss ylalmefsgntmtrdasravlrfvtvtaealrfrqiqrefrqalsetapvytmtpgdvdltlnwgrisnvlpeyrgedgv rvgrisfnnisailgtvavilnchhqgarsvravnedsqpecqitgdrpvikinntlwesntaaaflnrksqflyttgkm kkmfmavlfalvsvnamaadcakgkiefskynendtftvkvagkeywtsrwnlqpllqsaqltgmtvtiksstce…	>stx2	56	FM998860	ATGAAGTGTATATTATTTAAATGGGTACTGTGCCTGTTACTGGGTTTTTCTTCGGTATCCTATTCCCGGGAGTTTACGATAGACTTTTCGACCCAACAAAGTTATGTCTCTTCGTTAAATACTATACGGACAGAAATATCGACTCCTCTTGAGCATATATCTCAGGGGACCACATCGGTGTCTGTTATTAACCACACCCCACCGGGCAGTTATTTTGCTGTGGATATACGAGGGCTTGATGTCTATCAGGCGCGTTTTGACCATCTTCGTCTGATTATTGAGCAAAATAATTTATATGTGGCCGGGTTCGTTAATACGGCAACAAATACTTTCTACCGTTTTTCAGATTTTACACATATATCAGTGCCCGGTGTGACAACGGTTTCCATGACAACGGAC…
Stx2d1-O91-B2F1	58	AF479828	mkcilfkwvlclllgfssvsysreftidfstqqsyvsslntirteistplehisqgttsvsvinhtppgsyfavdirgld vyqarfdhlrliieqnnlyvagfvntatntfyrfsdfthisvpgvttvsmttdssyttlqrvaalersgmqisrhslvss ylalmefsgntmtrdasravlrfvtvtaealrfrqiqrefrqalsetapvytmtpgdvdltlnwgrisnvlpeyrgedgv rvgrisfnnisailgtvavilnchhqgarsvravneesqpecqitgdrpvikinntlwesntaaaflnrksqslyttgem kkmfmavlfalvsvnamaadcakgkiefskynendtftvkvagkeywtsrwnlqpllqsaqltgmtvtiksstce…	>stx2	58	AF479828	ATGAAGTGTATATTATTTAAATGGGTACTGTGCCTGTTACTGGGTTTTTCTTCGGTATCCTATTCCCGGGAGTTTACGATAGACTTTTCGACCCAACAAAGTTATGTCTCTTCGTTAAATACTATACGGACAGAAATATCGACTCCTCTTGAGCATATATCTCAGGGGACCACATCGGTGTCTGTTATTAACCACACCCCACCGGGCAGTTATTTTGCTGTGGATATACGAGGGCTTGATGTCTATCAGGCGCGTTTTGACCATCTTCGTCTGATTATTGAGCAAAATAATTTATATGTGGCCGGGTTCGTTAATACGGCAACAAATACTTTCTACCGTTTTTCAGATTTTACACATATATCAGTGCCCGGTGTGACAACGGTTTCCATGACAACGGAC…
Stx2d2-O91-B2F1	69	AF479829.2	mkcilfkwvlclllgfssvsysreftidfstqqsyvsslnsirteistplehisqgttsvsvinhtppgsyfavdirgld vyqarfdhlrliieqnnlyvagfvntatntfyrfsdfthisvpgvttvsmttdssyttlqrvaalersgmqisrhslvss ylalmefsgntmtrdasravlrfvtvtaealrfrqiqrefrqalsetapvytmtpgdvdltlnwgrisnvlpeyrgedgv rvgrisfnnisailgtvavilnchhqgarsvramneesqpecqitgdrpvikinntlwesntaaaflnrksqslyttgem kkmfmavlfalvsvnampadcakgkiefskynendtftvkvagkeywtsrwnlqpllqsaqltgmtvtiksstce…	>stx2	69	AF479829.2	atgaagtgtatattatttaaatgggtactgtgcctgttactgggtttttcttcggtatcctattcccgggagtttacgatagacttttcgacccaacaaagttatgtctcttcgttaaatagtatacggacagagatatcgacccctcttgaacatatatctcaggggaccacatcggtgtctgttattaaccacaccccgccgggcagttattttgctgtggatatacgagggcttgatgtctatcaggcgcgttttgaccatcttcgtctgattattgagcaaaataatttatatgtggccgggttcgttaatacggcaacaaatactttctaccgtttttcagattttacacatatatcagtgcccggtgtgacaacggtttccatgacaacggac…
Stx2d-O103-pVTEC7	62	AY443048	mkcilfkwvlclllgfssvsyfreftidfstqqsyvsslnsirteistplehisqgttsvsvinhtppgsyfavdirgld vyqarfdhlrliieqnnlyvagfvntatntfyrfsdfthisvpgattvsmttdssyttlqrvaalersgmqisrhslvss ylalmefsgntmtrdasravlrfvtvtaealrfrqiqrefrqalsetapvytmtpgdvdltlnwgrisnvlpeyrgedgv rvgrisfnnisailgtvavilnchhqgarsvravneesqpecqitgdrpvikinntlwesnttaaflnrksqslyttgem kkmfmvvlfalvsvnamaadcaxgkiefskynendtftvkvagkeywtsrwnlqpllqsaqltgmtvtiksstce…	>stx2	62	AY443048	ATGAAGTGTATATTATTTAAATGGGTACTGTGCCTGTTACTGGGTTTTTCTTCGGTATCCTATTTCCGGGAATTTACGATAGACTTTTCGACTCAACAAAGTTATGTCTCTTCGTTAAATAGTATACGGACAGAGATATCGACCCCTCTTGAACATATATCTCAGGGGACCACATCGGTGTCTGTTATTAACCACACCCCGCCGGGCAGTTATTTTGCTGTGGATATACGAGGGCTTGATGTCTATCAGGCGCGTTTTGACCATCTTCGTCTGATTATTGAGCAAAATAATTTATATGTGGCCGGGTTCGTTAATACGGCAACAAATACTTTCTACCGTTTTTCAGATTTTACACATATATCAGTGCCCGGTGCGACAACGGTTTCCATGACAACGGAC…
Stx2d-O113-TS03-07	66	FM998840	mkcilfkwvlclllgfssvsysreftidfstqqsyvsslnsiraeistplehisqgttsvsvinhtppgsyfavdirgld vyqarfdhlrliieqnnlyvagfvntatntfyrfsdfthisvpgvttvsmttdssyttlqrvaalersgmqisrhslvss ylalmefsgntmtrdasravlrfvtviaealrfrqiqrefrqalsetapvytmmpgdvdltlnwgrisnvlpeyrgedgv rvgrisfnnisailgtvavilnchhqgarsvravneesqpecqitgdrpvikinntlwesntaaaflnrksqslyttgem kkmfmavlfalvsvnamaadcakgkiefskynendtftvkvagkeywtsrwnlqpllqsaqltgmtvtiksstce…	>stx2	66	FM998840	ATGAAGTGTATATTATTTAAATGGGTACTGTGCCTGTTACTGGGTTTTTCTTCGGTATCCTATTCCCGGGAATTTACGATAGACTTTTCGACTCAACAAAGTTATGTCTCTTCGTTAAATAGTATACGGGCAGAGATATCGACCCCTCTTGAACATATATCTCAGGGGACCACATCGGTGTCTGTTATTAACCACACCCCGCCGGGCAGTTATTTTGCTGTGGATATACGAGGGCTTGATGTCTATCAGGCGCGTTTTGACCATCTTCGTCTGATTATTGAGCAAAATAATTTATATGTGGCCGGGTTCGTTAATACGGCAACAAATACTTTCTACCGTTTTTCAGATTTTACACATATATCAGTGCCCGGTGTGACAACGGTTTCCATGACAACGGAC…
Stx2d-O113-TS21-08	81	FM998855	mkcilfkwvlclllgfssvsysreftidfstqqsyvsslnsirteistplehisqgttsvsvinhtppgsyfavdirgld vyqarfdhlrliieqnnlyvagfvntatntfyrfsdfahisvpgvttvsmttdssyttlqrvaalersgmqisrhslvss ylalmefsgntmtrdasravlrfvtvtaealrfrqiqrefrqalsetapvytmtpgdvdltlnwgrisnvlpeyrgedgv rvgrisfnnisailgtvavilnchhqgarsvravneesqpecqitgdrpvikinntlwesntaaaflnrksqslyttgem kkmfmavlfalvsvnamaadcakgkiefskynendtftvkvdgkeywtsrwnlqpllqsaqltgmtvtiksstca…	>stx2	81	FM998855	ATGAAGTGTATATTATTTAAATGGGTACTGTGCCTGTTACTGGGCTTTTCTTCGGTATCCTATTCCCGGGAATTTACGATAGACTTTTCGACTCAACAAAGTTATGTATCTTCGTTAAATAGTATACGGACAGAGATATCGACCCCTCTTGAACATATATCTCAGGGGACCACATCGGTGTCTGTTATTAACCACACCCCACCGGGCAGTTATTTTGCTGTGGATATACGAGGGCTTGATGTCTATCAGGCGCGTTTTGACCATCTTCGTCTGATTATTGAGCAAAATAATTTATATGTGGCCGGGTTCGTTAATACGGCAACAAATACTTTCTACAGATTTTCAGATTTTGCACATATATCAGTGCCCGGTGTGACAACGGTTTCCATGACAACGGAC…
Stx2d-O157-7279	72	X61283	mkcilfkwvlclllgfssvsysreftidfstqqsyvsslnsirtevstplehisqgttsvsvinhtppgsyfavdirgld vyqarfdhlrliieqnnlyvagfvntatntfyrfsdfthisvpgvttvsmttdssyttlqrvaalersgmqisrhslvss ylalmefsgntmtrdasravlrfvtvtaealrfrqiqrefrqalsetapvytmtpgdvdltlnwgrisnvlpeyrgedgv rvgrisfnnisailgtvavilnchhqgarsvravneesqpecqitgdrpvikinntlwesntaaaflnrksqslyttgem kkmfmavlfalvsvnamaadcakgkiefskynendtftvkvagkeywtsrwnlqpllqsaqltgmtvtiksstce…	>stx2	72	X61283	ATGAAGTGTATATTATTTAAATGGGTACTGTGCCTGTTACTGGGTTTTTCTTCGGTATCCTATTCCCGGGAGTTTACGATAGACTTTTCGACCCAACAAAGTTATGTCTCTTCGTTAAATAGTATACGGACAGAGGTATCGACCCCTCTTGAACATATATCTCAGGGGACCACATCGGTGTCTGTTATTAACCACACCCCGCCGGGCAGTTATTTTGCTGTGGATATACGAGGGCTTGATGTCTATCAGGCGCGTTTTGACCATCTTCGTCTGATTATTGAGCAAAATAATTTATATGTGGCCGGGTTCGTTAATACGGCAACAAATACTTTCTACCGTTTTTCAGATTTTACACATATATCAGTGCCCGGTGTGACAACGGTTTCCATGACAACGGAC…
Stx2d-O174-EC1720a	38	AF500189	mkcilfkwvlclllgfssvsysreftidfstqqsyvsslnsirteistplehisqgttsvsvinhtppgsyfavdirgld vyqarfdhlrliieqnnlyvagfvntatntfyrfsdfahisvpgvttvsmttdssyttlqrvaalersgmqisrhslvss ylalmefsgntmtrdasravlrfvtvtaealrfrqiqrefrqalsetapvytmtpgdvdltlnwgrisnvlpeyrgedgv rvgrisfnnisailgtvavilnchhqgarsvravneesqpecqitgdrpvikinntlwesntaaaflnrksqslyttgem kkmfmavlfalvsvnamaadcakgkiefskynendtftvkvagkeywtsrwnlqpllqsaqltgmtvtiksstce…	>stx2	38	AF500189	ATGAAGTGTATATTATTTAAATGGGTACTGTGCCTGTTACTGGGCTTTTCTTCGGTATCCTATTCCCGGGAATTTACGATAGACTTTTCGACTCAACAAAGTTATGTATCTTCGTTAAATAGTATACGGACAGAGATATCGACCCCTCTTGAACATATATCTCAGGGGACCACATCGGTGTCTGTTATTAACCACACCCCACCGGGCAGTTATTTTGCTGTGGATATACGAGGGCTTGATGTCTATCAGGCGCGTTTTGACCATCTTCGTCTGATTATTGAGCAAAATAATTTATATGTGGCCGGGTTCGTTAATACGGCAACAAATACTTTCTACAGATTTTCAGATTTTGCACATATATCAGTGCCCGGTGTGACAACGGTTTCCATGACAACGGAC…
Stx2d-O174-EC173b	67	AF500190	mkcilfkwvlclllgfssvsysreftidfstqqsyvsslnsirteistplehisqgttsvsvinhtppgsyfavdirgld vyqarfdhlrliieqnnlyvagfvntatntfyrfsdfthisvpgvttvsmttdssyttlqrvaalersgmqisrhslvss ylalmefsgntmtrdasravlrfvtvtaealrfrqiqrefrqalsetapvytmtpgdvdltlnwgrisnvlpeyrgedgv rvgrisfnnisailgtvavilnchhqgarsvravneesqpecqitgdrpvikinntlwesntaaaflnrksqslyttgem kkmfmavlfalvsvnamaadcakgkiefskynendtftvkvagkeywtsrwnlqpllqsaqltgmtvtiksstce…	>stx2	67	AF500190	ATGAAGTGTATATTATTTAAATGGGTACTGTGCCTGTTACTGGGTTTTTCTTCGGTATCCTATTCCCGGGAATTTACGATAGACTTTTCGACTCAACAAAGTTATGTCTCTTCGTTAAATAGTATACGGACAGAGATATCGACCCCTCTTGAACATATATCTCAGGGGACCACATCGGTGTCTGTTATTAACCACACCCCGCCGGGCAGTTATTTTGCTGTGGATATACGAGGGCTTGATGTCTATCAGGCGCGTTTTGACCATCTTCGTCTGATTATTGAGCAAAATAATTTATATGTGGCCGGGTTCGTTAATACGGCAACAAATACTTTCTACCGTTTTTCAGATTTTACACATATATCAGTGCCCGGTGTGACAACGGTTTCCATGACAACGGAC…
Stx2d-O22-ECA447	143	JAOQKQ010000001	mkcilfkwvlclllgfssvsysreftidfstqqsyvsslnsirteistplehisqgttsvsvinhtppgsyfavdirgld vyqarfdhlrliieqnnlyvagfvntatntfyrfsdfthisvpgvttvsmttdssyttlqrvaalersgmqisrhslvss ylalmefsgntmtrdasravlrfvtvtaealrfrqiqrefrqalsetapvytmtpgdvdltlnwgrisnvlpeyrgedgv rvgrisfnnisailgtvavilnchhqgarsvravneesqpecqitgdrpvikinntlwesntaaaflnrksqslyttgem kkmfmavlfalvsvnamaadcakgkiefskynendtftvkvagkeywtnrwnlqpllqsaqltgmtvtiksntca…	>stx2	143	JAOQKQ010000001	atgaagtgtatattatttaaatgggtactgtgcctgttactgggtttttcttcggtatcctattcccgggaatttacgatagacttttcgactcaacaaagttatgtctcttcgttaaatagtatacggacagagatatcgacccctcttgaacatatatctcaggggaccacatcggtgtctgttattaaccacaccccgccgggcagttattttgctgtggatatacgagggcttgatgtctatcaggcgcgttttgaccatcttcgtctgattattgagcaaaataatttatatgtggccgggttcgttaatacggcaacaaatactttctaccgtttttcagattttacacatatatcagtgcccggtgtgacaacggtttccatgacaacggac…
Stx2d-O28-MT71	77	AY095209	mkcilfkwvlclllgfssvsysreftidfstqqsyvsslnsirteistplehisqgttsvsvinhtppgsyfavdirgld vyqarfdhlrliieqnnlyvagfvntatntfyrfsdfthisvpgvttvsmttdssyttlqrvaalersgmqisrhslvss ylalmefsgntmtrdasravlrfvtvtaealrfrqiqrefrqalsetapvytmtpgdvdltlnwgrisnvlpeyrgedgv rvgrisfnnisailgtvavilnchhqgarsvravneesqpecqitgdrpvikinntlwesntaaaflnrksqslyttgem kkmfmavlfalvsvnamaadcakgkiefskynendtftvkvagkeywtsrwnlqpllqsaqltgmtvtiksstca…	>stx2	77	AY095209	ATGAAGTGTATATTATTTAAATGGGTACTGTGCCTGTTACTGGGTTTTTCTTCGGTATCCTATTCCCGGGAATTTACGATAGACTTTTCGACTCAACAAAGTTATGTCTCTTCGTTAAATAGTATACGGACAGAGATATCGACCCCTCTTGAACATATATCTCAGGGGACCACATCGGTGTCTGTTATTAACCACACCCCGCCGGGCAGTTATTTTGCTGTGGATATACGAGGGCTTGATGTCTATCAGGCGCGTTTTGACCATCTTCGTCTGATTATTGAGCAAAATAATTTATATGTGGCCGGGTTCGTTAATACGGCAACAAATACTTTCTACCGTTTTTCAGATTTTACACATATATCAGTGCCCGGTGTGACAACGGTTTCCATGACAACGGAC…
Stx2d-O2-EC604a	76	AF500192	mkcillkwvlclllgfssvsysreftidfstqqsyvsslnsirteistplehisqgttsvsvinhtppgsyfavdirgld vyqarfdhlrliieqnnlyvagfvntatntfyrfsdfthisvpgvttvsmttdssyttlqrvaalersgmqisrhslvss ylalmefsgntmtrdasravlrfvtvtaealrfrqiqrefrqalsetapvytmtpgdvdltlnwgrisnvlpeyrgedgv rvgrisfnnisailgtvavilnchhqgarsvravneesqpecqitgdrpvikinntlwesntaaaflnrksqslyttgem kkmfmavlfalvsvnamaadcakgkiefskynendtftvkvagkeywtsrwnlqpllqsaqltgmtvtiksstca…	>stx2	76	AF500192	ATGAAGTGTATATTGTTAAAATGGGTACTGTGCCTGTTACTGGGCTTTTCTTCGGTATCCTATTCCCGGGAATTTACGATAGACTTTTCGACTCAACAAAGTTATGTCTCTTCGTTAAATAGTATACGGACAGAGATATCGACCCCTCTTGAACATATATCTCAGGGGACCACATCGGTGTCTGTTATTAACCACACCCCACCGGGCAGTTATTTTGCTGTGGATATACGAGGGCTTGATGTCTATCAGGCGCGTTTTGACCATCTTCGTCTGATTATTGAGCAAAATAATTTATATGTGGCCGGGTTCGTTAATACGGCAACAAATACTTTCTACCGTTTTTCAGATTTTACACATATATCAGTGCCCGGTGTGACAACGGTTTCCATGACAACGGAC…
Stx2d-O55-5905	73	EF441605	mkciifkwvlclllgfssvsysreftidfstqqsyvsslnsirteistplehisqgttsvsvinhtppgsyfavdirgld vyqarfdhlrliieqnnlyvagfvntatntfyrfsdfahisvpgvttvsmttdssyttlqrvaalersgmqisrhslvss ylalmefsgntmtrdasravlrfvtvtaealrfrqiqrefrqalsetapvytmtpgdvdltlnwgrisnvlpeyrgedgv rvgrisfnnisailgtvavilnchhqgarsvravneesqpecqitgdrpvikinntlwesntaaaflnrksqslyttgem kkmfmavlfalvsvnamaadcakgkiefskynendtftvkvagkeywtsrwnlqpllqsarltgmtvtiksstce…	>stx2	73	EF441605	ATGAAGTGTATAATATTTAAATGGGTACTGTGCCTGTTACTGGGCTTTTCTTCGGTATCCTATTCCCGGGAATTTACGATAGACTTTTCGACTCAACAAAGTTATGTATCTTCGTTAAATAGTATACGGACAGAGATATCGACCCCTCTTGAACATATATCTCAGGGGACCACATCGGTGTCTGTTATTAACCACACCCCACCGGGCAGTTATTTTGCTGTGGATATACGAGGGCTTGATGTCTATCAGGCGCGTTTTGACCATCTTCGTCTGATTATTGAGCAAAATAATTTATATGTGGCCGGGTTCGTTAATACGGCAACAAATACTTTCTACAGATTTTCAGATTTTGCACATATATCAGTGCCCGGTGTGACAACGGTTTCCATGACAACGGAC…
Stx2d-O6-NV206	75	AF329817	mkcillkwvlclllgfssvsysreftidfstqqsyvsslnsirteistplehisqgttsvsvinhtppgsyfavdirgld vyqarfdhlrliieqnnlyvagfvntatntfyrfsdfthisvpgvttvsmttdssyttlqrvaalersgmqisrhslvss ylalmefsgntmtrdasravlrfvtvtaealrfrqiqrefrqalsetapvytmtpgdvdltlnwrrisnvlpeyrgedgv rvgrisfnnisailgtvavilnchhqgarsvravneesqpecqitgdrpvikinntlwesntaaaflnrksqslyttgem kkmfmavlfalvsvnamaadcakgkiefskynendtftvkvagkeywtsrwnlqpllqsaqltgmtvtiksstca…	>stx2	75	AF329817	ATGAAGTGTATATTGTTAAAATGGGTACTGTGCCTGTTACTGGGCTTTTCTTCGGTATCCTATTCCCGGGAATTTACGATAGACTTTTCGACTCAACAAAGTTATGTCTCTTCGTTAAATAGTATACGGACAGAGATATCGACCCCTCTTGAACATATATCTCAGGGGACCACATCGGTGTCTGTTATTAACCACACCCCACCGGGCAGTTATTTTGCTGTGGATATACGAGGGCTTGATGTCTATCAGGCGCGTTTTGACCATCTTCGTCTGATTATTGAGCAAAATAATTTATATGTGGCCGGGTTCGTTAATACGGCAACAAATACTTTCTACCGTTTTTCAGATTTTACACATATATCAGTGCCCGGTGTGACAACGGTTTCCATGACAACGGAC…
Stx2d-O73-C165-02	78	DQ059012	mkcilfkwvlclllgfssvsysreftidfstqqsyvsslnsirteistplehisqgttsvsvinhtppgsyfsvdirgld vyqarfdhlrliieqnnlyvagfvntatntfyrfsdfthisvpgvttvsmttdssyttlqrvaalersgmqisrhslvss ylalmefsgntmtrdasravlrfvtvtaealrfrqiqrefrqalsetapvytmtpgdvdltlnwgrisnvlpeyqgedgv rvgrisfnnisailgtvavilnchhqgarsvravnedsqpecqitgdrpvikinntlwesntaaaflnrksqslyttgem kkmfmavlfalvsvnamaadcakgkiefskynendtftvkvagkeywtnrwnlqpllqsaqltgmtvtiksstca…	>stx2	78	DQ059012	ATGAAGTGTATATTGTTTAAATGGGTACTGTGCCTGTTACTGGGCTTTTCTTCGGTATCCTATTCCCGGGAATTTACGATAGACTTTTCGACTCAACAAAGTTATGTATCTTCGTTAAATAGTATACGGACAGAGATATCGACCCCTCTTGAACACATATCTCAGGGGACCACATCGGTGTCTGTTATTAACCACACCCCACCGGGAAGTTATTTTTCTGTGGATATACGAGGGCTTGATGTCTATCAGGCGCGTTTTGACCATCTTCGTCTGATTATTGAGCAAAATAATTTATATGTGGCCGGGTTCGTTAATACGGCAACAAATACTTTCTACAGATTTTCAGATTTTACACATATATCAGTGCCCGGTGTGACAACGGTTTCCATGACAACGGAC…
Stx2d-O8-C466-01B	68	DQ235775	mkcilfkwvlclllgfssvsysreftidfstqqsyvsslnsirteistplehisqgttsvsvinhtppgsyfavdirgld vyqarfdhlrliieqnnlyvagfvntatntfyrfsdfthisvpdvttvsmttdssyttlqrvaalersgmqisrhslvss ylalmefsgntmtrdasravlrfvtvtaealrfrqiqrefrqalsetapvytmtpgdvdltlnwgrisnvlpeyrgedgv rvgrisfnnisailstvavilnchhqgarsvravneesqpecqitgdrpvikinntlwesntaaaflnrksqslyttgem kkmfmavlfalvsvnamaadcakgkiefskynendtftvkvagkeywtsrwnlqpllqsaqltgmtvtiksstce…	>stx2	68	DQ235775	ATGAAGTGTATATTATTTAAATGGGTACTGTGCCTGTTACTGGGTTTTTCTTCGGTATCCTATTCCCGGGAGTTTACGATAGACTTTTCGACCCAACAAAGTTATGTCTCTTCGTTAAATAGTATACGGACAGAGATATCGACCCCTCTTGAACATATATCTCAGGGGACCACATCGGTGTCTGTTATTAACCACACCCCACCGGGCAGTTATTTTGCTGTGGATATACGAGGGCTTGATGTCTATCAGGCGCGTTTTGACCATCTTCGTCTGATTATTGAGCAAAATAATTTATATGTGGCCGGGTTCGTTAATACGGCAACAAATACTTTCTACCGTTTTTCAGATTTTACACATATATCAGTGCCCGATGTGACAACGGTTTCCATGACAACGGAC…
Stx2d-ONT-EBC275	57	AY443047	mkcilfkwvlclllgfssvsysreftidfstqqsyvsslntirteistplehisqgttsvsvinhtppgsyfavdirgld vyqarfdhlrliieqnnlyvagfvntatntfyrfsdfthisvpgvttvsmttdssyttlqrvaalersgmqisrhslvss ylalmefsgntmtrdasravlrfvtvtaealrfrqiqrefrqalsetapvytmtpgdvdltlnwgqisnvlpeyrgedgv rvgrisfnnisailgtvavilnchhqgarsvravneesqpecqitgdrpvikinntlwesntaaaflnrksqslyttgem kkmfmavlfalvsvnamaadcakgkiefskynendtftvkvagkeywtsrwnlqpllqsaqltgmtvtiksstce…	>stx2	57	AY443047	ATGAAGTGTATATTATTTAAATGGGTACTGTGCCTGTTACTGGGCTTTTCTTCGGTATCCTATTCCCGGGAGTTTACGATAGACTTTTCGACCCAACAAAGTTATGTCTCTTCGTTAAATACTATACGGACAGAAATATCGACTCCTCTTGAGCATATATCTCAGGGGACCACATCGGTGTCTGTTATTAACCACACCCCACCGGGCAGTTATTTTGCTGTGGATATACGAGGGCTTGATGTCTATCAGGCGCGTTTTGACCATCTTCGTCTGATTATTGAGCAAAATAATTTATATGTGGCCGGGTTCGTTAATACGGCAACAAATACTTTCTACCGTTTTTCAGATTTTACACATATATCAGTGCCCGGTGTGACAACGGTTTCCATGACAACGGAC…
Stx2d-ONT-EC1871a	64	AF500191	mkcilfkwvlclllgfssvsysreftidfstqqsyvsslnsirteistplehisqgttsvsvinhtppgsyfavdirgld vyqarfdhlrliieqnnlyvagfvntatntfyrfsdfthisvpgvttvsmttdssyttlqrvaalersgmqisrhslvss ylalmefsgntmtrdasravlrfvtvtaealrfrqiqrefrqvlsetapvytmtpgdvdltlnwgrisnvlpeyrgedgv rvgrisfnnisailgtvavilnchhqgarsvravnedsqpecqitgdrpvikinntlwesntaaaflnrksqslyttgem kkmfmavlfalvsvnamaadcakgkiefskynendtftvkvagkeywtsrwnlqpllqsaqltgmtvtiksstce…	>stx2	64	AF500191	ATGAAGTGTATATTATTTAAATGGGTACTGTGCCTGTTACTGGGTTTTTCTTCGGTATCCTATTCCCGGGAATTTACGATAGACTTTTCGACCCAACAAAGTTATGTCTCTTCGTTAAATAGTATACGGACAGAGATATCGACCCCTCTTGAACATATATCTCAGGGGACCACATCGGTGTCTGTTATTAACCACACCCCGCCGGGCAGTTATTTTGCTGTGGATATACGAGGGCTTGATGTCTATCAGGCGCGTTTTGACCATCTTCGTCTGATTATTGAGCAAAATAATTTATATGTGGCCGGGTTCGTTAATACGGCAACAAATACTTTCTACCGTTTTTCAGATTTTACACATATATCAGTGCCCGGTGTGACAACGGTTTCCATGACAACGGAC…
Stx2e-O100-TS01-07	118	FM998838	mkcillkwilclllgfssvsysqeftidfstqqsyvsslnsirtaistplehisqgatsvsvinhtplgsyisvgirgld vyqerfdhlrliiernnlyvagfvntttntfyrfsdfahislpgvttismttdssyttlqrvaalersgmqisrhslvss ylalmefsgntmtrdasravlrfvtvtaealrfrqiqrefrlalsetapvytmtpedvdltlnwgrisnvlpeyrgeagv rvgrisfnnisailgtvavilnchhqgarsvravneesqpecqitgdrpvikinntlwesntaaaflnrksqplyttgem kkmfiavlfalvsvnamaadcakgkiefskynedntftvkvsgreywtnrwnlqpllqsaqltgmtvtiisntcs…	>stx2	118	FM998838	ATGAAGTGTATATTGTTAAAGTGGATACTGTGCCTGTTACTGGGTTTTTCTTCGGTATCCTATTCCCAGGAGTTTACGATAGACTTTTCGACTCAACAAAGTTATGTATCTTCGTTAAATAGTATACGGACAGCGATATCGACCCCTCTTGAACATATATCTCAGGGAGCTACATCGGTATCCGTTATTAATCATACACCACTAGGAAGTTATATTTCCGTAGGTATACGAGGGCTTGATGTTTATCAGGAGCGTTTTGACCATCTTCGTCTGATTATTGAACGAAATAATTTATATGTGGCTGGATTTGTTAATACGACAACAAATACTTTCTACAGATTTTCAGATTTTGCACATATATCATTGCCCGGTGTGACAACTATTTCCATGACAACGGAC…
Stx2e-O101-E-D42	106	X81418	mkcillkwilclllgfssvsysqeftidfstqqsyvsslhsirtaistplehisqgatsvsvinhtppgsyisvgirgld vyqeridhlrliiernnlyvagfvntttntfyrfsdfahislpgvttismttdssyttlqrvaalersgmqisrhslvss ylalmefsgntmtrdasravlrfvtvtaealrfrqiqrefrlalsetapvytmtpedvdltlnwgrisnvlpeyrgeagv rvgrisfnnisailgtvavilnchhqgarsvravneesqpecqitgdrpvikinntlwesntaaaflnrksqplyttgem kkmfiavlfalvsvnamaadcakgkiefskynedntftvkvsgreywtnrwnlqpllqsaqltgmtvtiisntcs…	>stx2	106	X81418	ATGAAGTGTATATTGTTAAAGTGGATACTGTGCCTGTTACTGGGTTTTTCTTCGGTATCCTATTCCCAGGAGTTCACGATAGACTTTTCGACTCAACAAAGTTATGTATCTTCGTTACATAGTATACGGACAGCGATATCGACCCCTCTTGAACATATATCTCAGGGAGCTACATCGGTATCCGTTATTAATCATACACCACCAGGAAGTTATATTTCCGTAGGTATACGAGGGCTTGATGTTTATCAGGAGCGCATTGACCATCTTCGACTGATTATTGAACGAAATAATTTATATGTGGCTGGATTTGTTAATACGACAACAAATACTTTCTACAGATTTTCAGATTTTGCACATATATCATTGCCCGGTGTGACAACTATTTCCATGACAACGGAC…
Stx2e-O101-E-D43	111	X81417	mkcillkwilclllgfssvsysqeftidfstqqsyvsslnsirtaistplehisqgatsvsvinhtppgsyisvgirgld vyqerfdhlrliiernnlyvvgfvntttntsyrfsdfahislpgvttismttdssyttlqrvaalersgmqisrhslvss ylalmefsgntmtrdasravlrfvtvtaealrfrqiqrefrlalsetapvytmtpedvdltlnwgrisnvlpeyrgeagv rvgrisfnnisailgtvavilnchhqgarsvravneesqpecqitgdrpvikinntlwesntaaaflnrksqslyttgem kkmfiavlfalvsvnamaadcakgkiefskynedntftvkvsgreywtnrwnlqpllqsaqltgmtvtiisntcs…	>stx2	111	X81417	ATGAAGTGTATATTGTTAAAGTGGATACTGTGTCTGTTACTGGGTTTTTCTTCGGTATCCTATTCCCAGGAGTTTACGATAGACTTTTCGACTCAACAAAGTTATGTATCTTCGTTAAATAGTATACGGACAGCGATATCGACCCCTCTTGAACATATATCTCAGGGAGCTACATCGGTATCCGTTATTAATCATACACCACCAGGAAGTTATATTTCCGTAGGTATACGAGGGCTTGATGTTTATCAGGAGCGTTTTGACCATCTTCGTCTGATTATTGAACGAAATAATTTATATGTGGTTGGATTTGTTAATACGACAACAAATACTTCCTACAGATTTTCAGATTTTGCACATATATCATTGCCCGGTGTGACAACTATTTCCATGACAACGGAC…
Stx2e-O101-E-D53	113	X81416	mkcillkwilclllgfssvsysqeftidfstqqsyvsslnsirtaistplehisqgatsvsvinhtppgsyisvgirgld vyqerfdhlrliiernnlyvagfvntttntsyrfsdfahislpgvttismttdssyttlqrvaalersgmqisrhslvss ylalmefsgntmtrdasravlrfvtvtaealrfrqiqrefrlalsetapvytmtpedvdltlnwgrisnvlpeyrgeagv rvgrisfnnisailgtvavilnchhqgarsvravneesqpecqitgdrpvikinntlwesntaaaflnrksqplyttgem kkmfiavlfalvsvnamaadcakgkiefskynedntftvkvsgreywtnrwnlqpllqsaqltgmtvtiisntcs…	>stx2	113	X81416	ATGAAGTGTATATTGTTAAAGTGGATACTGTGCCTGTTACTGGGTTTTTCTTCGGTATCCTATTCCCAGGAGTTTACGATAGACTTTTCGACTCAACAAAGTTATGTATCTTCGTTAAATAGTATACGGACAGCGATATCGACCCCTCTTGAACATATATCTCAGGGAGCTACATCGGTATCCGTTATTAATCATACACCACCAGGAAGTTATATTTCCGTAGGTATACGAGGGCTTGATGTTTATCAGGAGCGTTTTGACCATCTTCGTCTGATTATTGAACGAAATAATTTATATGTGGCTGGATTTGTTAATACGACAACAAATACTTCCTACAGATTTTCAGATTTTGCACATATATCATTGCCCGGTGTGACAACTATTTCCATGACAACGGAC…
Stx2e-O101-E-D68	112	X81415	mkcillkwilclllgfssvsysqeftidfstqqsyvsslnsirtaistplehisqgatsvsvinhtppgsyisvgirgld vyqerfdhlrliiernnlyvvgfvntttntsyrfsdfahislpgvttismttdssyttlqrvaalersgmqisrhslvss ylalmefsgntmtrdasravlrfvtvtaealrfrqiqrefrlalsetapvytmtpedvdltlnwgrisnvlpeyrgeagv rvgrisfnnisailgtvavilnchhqgarsvravneesqpecqitgdrpvikinntlwesntaaaflnrksqplyttgem kkmfiavlfalvsvnamaadcakgkiefskynedntftvkvsgreywtnrwnlqpllqsaqltgmtvtiisntcs…	>stx2	112	X81415	ATGAAGTGTATATTGTTAAAGTGGATACTGTGCCTGTTACTGGGTTTTTCTTCGGTATCCTATTCCCAGGAGTTTACGATAGACTTTTCGACTCAACAAAGTTATGTATCTTCGTTAAATAGTATACGGACAGCGATATCGACCCCTCTTGAACATATATCTCAGGGAGCTACATCGGTATCCGTTATTAATCATACACCACCAGGAAGTTATATTTCCGTAGGTATACGAGGGCTTGATGTTTATCAGGAGCGTTTTGACCATCTTCGTCTGATTATTGAACGAAATAATTTATATGTGGTTGGATTTGTTAATACGACAACAAATACTTCCTACAGATTTTCAGATTTTGCACATATATCATTGCCCGGTGTGACAACTATTTCCATGACAACGGAC…
Stx2e-O121-NP9621	119	AY332411	mkcillkwilclllgfssvsysqeftidfstqqsyvsslnsirtaistplehisqgatsvsvinhtppgsyisvgirgld vyqerfdhlrliiernnlyvagfvntttntfyrfsdfahislpgvttismttdssyttpqrvaalersgmqvsrhslvss ylalmefsgntmtreasravlrfvtvtaealrfrqiqrefrqalsetapvytmtpedvdltlnwgrisnvlpeyrgeagv rvgrisfnnisailgtvavilnchhqgarsvravneesqpecqitgdrpvikitnklwesntaaaflnrksqplyttgem kkmfiavlfalvsvnamaadcakgkiefskynedntftvkvsgreywtnrwnlqpllqsaqltgmtvtiisntcs…	>stx2	119	AY332411	ATGAAGTGTATATTGTTAAAGTGGATACTGTGTCTGTTACTGGGTTTTTCTTCGGTATCCTATTCCCAGGAGTTTACGATAGACTTTTCGACTCAACAAAGTTATGTATCTTCGTTAAATAGTATACGGACAGCGATATCGACCCCTCTTGAACATATATCTCAGGGAGCTACATCGGTATCCGTTATTAATCATACACCACCAGGAAGTTATATTTCCGTAGGTATACGAGGGCTTGATGTTTATCAGGAGCGTTTTGACCATCTTCGTCTGATTATTGAACGAAATAATTTATATGTGGCTGGATTTGTTAATACGACAACAAATACTTTCTACAGATTTTCAGATTTTGCACATATATCATTGCCCGGTGTGACGACTATTTCCATGACAACGGAC…
Stx2e-O139-S1191	110	M21534	mkcillkwilclllgfssvsysqeftidfstqqsyvsslnsirtaistplehisqgatsvsvinhtppgsyisvgirgld vyqerfdhlrliiernnlyvagfvntttntfyrfsdfahislpgvttismttdssyttlqrvaalersgmqisrhslvss ylalmefsgntmtrdasravlrfvtvtaealrfrqiqrefrlalsetapvytmtpedvdltlnwgrisnvlpeyrgeagv rvgrisfnnisailgtvavilnchhqgarsvravneesqpecqitgdrpvikinntlwesntaaaflnrksqslyttgem kkmfiavlfalvsvnamaadcakgkiefskynedntftvkvsgreywtnrwnlqpllqsaqltgmtvtiisntcs…	>stx2	110	M21534	ATGAAGTGTATATTGTTAAAGTGGATACTGTGTCTGTTACTGGGTTTTTCTTCGGTATCCTATTCCCAGGAGTTTACGATAGACTTTTCGACTCAACAAAGTTATGTATCTTCGTTAAATAGTATACGGACAGCGATATCGACCCCTCTTGAACATATATCTCAGGGAGCTACATCGGTATCCGTTATTAATCATACACCACCAGGAAGTTATATTTCCGTAGGTATACGAGGGCTTGATGTTTATCAGGAGCGTTTTGACCATCTTCGTCTGATTATTGAACGAAATAATTTATATGTGGCTGGATTTGTTAATACGACAACAAATACTTTCTACAGATTTTCAGATTTTGCACATATATCATTGCCCGGTGTGACAACTATTTCCATGACAACGGAC…
Stx2e-O22-3615-99	107	AJ313016	mkcillkwilclllgfssvsysqeftidfstqqsyvsslnsirtaistplehisqgatsvsvinhtppgsyisvgirgld vyqerfdhlrliiernnlyvagfvntttntfyrfsdfahislpgvttismttdssyttlqrvaalersgmqisrhslvss ylalmefsgntmtrdasravlrfvtvtaealrfrqiqrefrlalsetapvytmtpedvdltlnwgrisnvlpeyrgeagv rvgrisfnnisailgtvavilnchhqgarsvravneesqpecqitgdrpvikinntlwesntaaaflnrksqplyttgem kkmfiavlfalvsvnamaadcakgkiefskynedntftvkvsgreywtnrwnlqpllqsaqltgmtvtiisntcs…	>stx2	107	AJ313016	ATGAAGTGTATATTGTTAAAGTGGATACTGTGCCTGTTACTGGGTTTTTCTTCGGTATCCTATTCCCAGGAGTTTACGATAGACTTTTCGACTCAACAAAGTTATGTATCTTCGTTAAATAGTATACGGACAGCGATATCGACCCCTCTTGAACATATATCTCAGGGAGCTACATCGGTATCCGTTATTAATCATACACCACCAGGAAGTTATATTTCCGTAGGTATACGAGGGCTTGATGTTTATCAGGAGCGTTTTGACCATCTTCGTCTGATTATTGAACGAAATAATTTATATGTGGCTGGATTTGTTAATACGACAACAAATACTTTCTACAGATTTTCAGATTTTGCACATATATCATTGCCCGGTGTGACAACTATTTCCATGACAACGGAC…
Stx2e-O26-R107	109	U72191	mecillkwilclllgfssvsysqeftidfptqqsyvsslnsirtaistplehisqgatsvsvinhtppgsyisvgirgld vyqerfdhlrpiiernnlyvagfvntttntfyrfsdfahislpgvttismttdssyttlqrvaalersgmqisrhslvss ylalmefsgntmtrdasravlrfvtvtaealrfrqiqrefrlalsetapvytmtpedvdltlnwgrisnvlpeyrgeagv rvgrisfnnisailgtvavilnchhqgarsvravneesqpecqitgdrpvikinntlwesntaaaflnrksqslyttgem kkmfiavlfalvsvnamaadcakgkiefskynedntftvkvsgreywtnrwnlqpllqsaqltgmtvtiisntcs…	>stx2	109	U72191	ATGGAGTGTATATTGTTAAAGTGGATACTGTGTCTGTTACTGGGTTTTTCTTCGGTATCCTATTCCCAGGAGTTTACGATAGACTTTCCGACTCAACAAAGTTATGTATCTTCGTTAAATAGTATACGGACAGCGATATCGACCCCTCTTGAACATATATCTCAGGGAGCTACATCGGTATCCGTTATTAATCATACACCACCAGGAAGTTATATTTCCGTAGGTATACGAGGGCTTGATGTTTATCAGGAGCGTTTTGACCATCTTCGTCCGATTATTGAACGAAATAATTTATATGTGGCTGGATTTGTTAATACGACAACAAATACTTTCTACAGATTTTCAGATTTTGCACATATATCATTGCCTGGTGTGACAACTATTTCCATGACAACGGAC…
Stx2e-ONT-2771	121	AJ249351	mkcillkwilclllgfssvsysqeftidfstqqsyvsslnsirtaistplehisqgatsvsvinhtppgsyisvgirgld vyqerfdhlrliiernnlyvagfvntttntfyrfsdfahislpgvttismttdssyttlqrvaalersgmqisrhslvss ylalmefsgntmtrdasravlrfvtvtaealrfrqiqrefrlalsetapvytmtpedvdltlnwgrisnvlpeyrgeagv rvgrisfnnisailgtvavilnchhqgarsvravneesqpecqitgdrpvikinnklwesntaaaflnrksqplyttgem kkmfiavlfalvsvnamaadcakgkiefskynedntftvkvsgreywtnrwnlqpllqsaqltgmtvtiisntcs…	>stx2	121	AJ249351	ATGAAGTGTATATTGTTAAAGTGGATACTGTGCCTGTTACTGGGTTTTTCTTCGGTATCCTATTCCCAGGAGTTTACGATAGACTTTTCGACTCAACAAAGTTATGTATCTTCGTTAAATAGTATACGGACAGCGATATCGACCCCTCTTGAACATATATCTCAGGGAGCTACATCGGTATCCGTTATTAATCATACACCACCAGGAAGTTATATTTCCGTAGGTATACGAGGGCTTGATGTTTATCAGGAGCGTTTTGACCATCTTCGTCTGATTATTGAACGAAATAATTTATATGTGGCTGGATTTGTTAATACGACAACAAATACTTTCTACAGATTTTCAGATTTTGCACATATATCATTGCCCGGTGTGACAACTATTTCCATGACAACGGAC…
Stx2e-ONT-TS03-08	115	FM998846	mkcillkwilclllgfssvsysqeftidfstqqsyvsslnsirtaistplehisqgatsvsvinhtppgsyisvgirgld vyqerfdhlrliiernnlyvagfvntttntfyrfsdfahislpgvtiismttdssyttlqrvaalersgmqisrhslvss ylalmefsgntmtrdasravlrfvtvtaealrfrqiqrefrlalsetapvytmtpedvdltlnwgrisnvlpeyrgeagv rvgrisfnnisailgtvavilnchhqgarsvravneesqpecqitgdrpvikinntlwesntaaaflnrksqplyttgem kkmfiavlfalvsvnamaadcakgkiefskynedntftvkvsgreywtnrwnlqpllqsaqltgmtvtiisntcs…	>stx2	115	FM998846	ATGAAGTGTATATTGTTAAAGTGGATACTGTGCCTGTTACTGGGTTTTTCTTCGGTATCCTATTCCCAGGAGTTTACGATAGACTTTTCGACTCAACAAAGTTATGTATCTTCGTTAAATAGTATACGGACAGCGATATCGACCCCTCTTGAACATATATCTCAGGGAGCTACATCGGTATCCGTTATTAATCATACACCACCAGGAAGTTATATTTCCGTAGGTATACGAGGGCTTGATGTTTATCAGGAGCGTTTTGACCATCTTCGTCTGATTATTGAACGAAATAATTTATATGTGGCTGGATTTGTTAATACGACAACAAATACTTTCTACAGATTTTCAGATTTTGCACATATATCATTGCCCGGTGTGACAATTATTTCCATGACAACGGAC…
Stx2e-ONT-TS29-08	114	FN182286	mkcillkwilclllgfssvsysqeftidfstqqsyvsslnsirtaistplehisqgatsvsvinhtppgsyisvgirgld vyqerfdhlrliiernnlyvagfvntttntfyrfsdfahislpgvttismttdssyttlqrvaalersgmqisrhslvss ylalmefsgntmtrdasravlrfvtvtaealrfrqiqrefrlalsetapvytmtpedvdltlnwgrisnvlpeyrgeagv rvgriffnnisailgtvavilnchhqgarsvravneesqpecqitgdrpvikinntlwesntaaaflnrksqplyttgem kkmfiavlfalvsvnamaadcakgkiefskynedntftvkvsgreywtnrwnlqpllqsaqltgmtvtiisntcs…	>stx2	114	FN182286	ATGAAGTGTATATTGTTAAAGTGGATACTGTGCCTGTTACTGGGTTTTTCTTCGGTATCCTATTCCCAGGAGTTTACGATAGACTTTTCGACTCAACAAAGTTATGTATCTTCGTTAAATAGTATACGGACAGCGATATCGACCCCTCTTGAACATATATCTCAGGGAGCTACATCGGTATCCGTTATTAATCATACACCACCAGGAAGTTATATTTCCGTAGGTATACGAGGGCTTGATGTTTATCAGGAGCGTTTTGACCATCTTCGTCTGATTATTGAACGAAATAATTTATATGTGGCTGGATTTGTTAATACGACAACAAATACTTTCTACAGATTTTCAGATTTTGCACATATATCATTGCCCGGTGTGACAACTATTTCCATGACAACGGAC…
Stx2e-OR-TS09-07	108	FM998844	mkcillkwilclllgfssvsysreftidfstqqsyvsslnsirtaistplehisqgatsvsvinhtppgsyisvgirgld vyqerfdhlrliiernnlyvagfvntttntfyrfsdfahislpgvttismttdssyttlqrvaalersgmqisrhslvss ylalmefsgntmtrdasravlrfvtvtaealrfrqiqrefrlalsetapvytmtpedvdltlnwgrisnvlpeyrgeagv rvgrisfnnisailgtvavilnchhqgarsvravneesqpecqitgdrpvikinntlwesntaaaflnrksqslyttgem kkmfiavlfalvsvnamaadcakgkiefskynedntftvkvsgreywtnrwnlqpllqsaqltgmtvtiisntcs…	>stx2	108	FM998844	ATGAAGTGTATATTGTTAAAGTGGATACTGTGTCTGTTACTGGGTTTTTCTTCGGTATCCTATTCCCGGGAGTTTACGATAGACTTTTCGACTCAACAAAGTTATGTATCTTCGTTAAATAGTATACGGACAGCGATATCGACCCCTCTTGAACATATATCTCAGGGAGCTACATCGGTATCCGTTATTAATCATACACCACCAGGAAGTTATATTTCCGTAGGTATACGAGGGCTTGATGTTTATCAGGAGCGTTTTGACCATCTTCGTCTGATTATTGAACGAAATAATTTATATGTGGCTGGATTTGTTAATACGACAACAAATACTTTCTACAGATTTTCAGATTTTGCACATATATCATTGCCCGGTGTGACAACTATTTCCATGACAACGGAC…
Stx2f-O115 F08-101-31	103	AB472687	mrhillklvlffcvclssvsyadeftvdfssqksyvdslnsirsaistplgnisqggisvsvinhvpggnyislnvrgle pyserfnhlrlimernnlyvagfintetntfyrfsdfshisvpdvitvsmttdssysslqriadlertgmqigrhslvgs yldlmefrgrsmtrassramlrfvtviaealrfrqiqrgfrpalseasplytmtaqdvdltlnwgrisnvlpeyrgeegv rigrisfnslsailgsvavilnchstgsysvrsvsqkqktecqivgdraaikvnnvlweantiaallnrkpqgltepnqm kkmiiavlfglfsansmaadcavgkiefskynedntftvrvsgreywtnrwnlqpllqsaqltgmtvtiisntcs…	>stx2	103	AB472687	ATGCGACATATATTATTAAAGCTGGTGTTGTTTTTTTGTGTTTGCTTGTCTTCAGTATCTTATGCAGATGAGTTTACTGTGGATTTCTCTTCGCAAAAGAGCTATGTTGATTCATTGAATAGTATAAGGTCGGCAATATCCACTCCGCTTGGAAATATATCTCAGGGTGGTATTTCTGTTTCAGTAATTAATCATGTTCCAGGTGGAAACTATATATCATTGAATGTTAGAGGCCTTGAGCCATATAGCGAGAGATTTAACCACCTCCGTTTAATAATGGAACGGAATAACTTATATGTTGCAGGCTTTATTAATACTGAAACGAATACCTTTTACAGATTCTCCGATTTCTCACATATTTCAGTGCCTGATGTGATAACTGTTTCCATGACGACGGAC…
Stx2f-O128 T4-97	104	AJ010730	mrhillklvlffcvclssasyadeftvdfssqksyvdslnsirsaistplgnisqggvsvsvinhvpggnyislnvrgld pyserfnhlrlimernnlyvagfintetntfyrfsdfshisvpdvitvsmttdssysslqriadlertgmqigrhslvgs yldlmefrgrsmtrassramlrfvtviaealrfrqiqrgfrpalseasplytmtaqdvdltlnwgrisnvlpeyrgeegv rigrisfnslsailgsvavilnchstgsysvrsvsqkqktecqivgdraaikvnnvlweantiaallnrkpqdltepnqm kkmiiavlfglfsansmaadcavgkiefskyneddtftvkvsgreywtnrwnlqpllqsaqltgmtvtiisntcs…	>stx2	104	AJ010730	ATGCGACATATATTATTAAAGCTGGTGTTGTTTTTTTGTGTTTGCTTGTCTTCAGCATCTTATGCAGATGAGTTTACTGTGGATTTCTCTTCGCAAAAGAGCTATGTTGATTCATTGAATAGTATAAGGTCGGCAATATCCACTCCACTTGGAAATATATCTCAGGGTGGTGTTTCTGTTTCAGTAATTAATCATGTTCCAGGCGGAAACTATATATCATTGAATGTTAGAGGCCTTGATCCATATAGCGAGAGATTTAACCACCTCCGTTTAATAATGGAACGGAATAACTTATATGTTGCAGGCTTTATTAATACTGAAACGAATACCTTTTACAGATTCTCCGATTTCTCACATATTTCAGTGCCTGATGTGATAACTGTTTCCATGACGACGGAC…
Stx2f-O128-HI8	105	M29153	mrhillklvlffcvclssasyadeftvdfssqksyvdslnsirsaistplgnisqggvsvsvinhvlggnyislnvrgld pyserfnhlrlimernnlyvagfintetnifyrfsdfshisvpdvitvsmttdssysslqriadlertgmqigrhslvgs yldlmefrgrsmtrassramlrfvtviaealrfrqiqrgfrpalseasplytmtaqdvdltlnwgrisnvlpeyrgeegv rigrisfnslsailgsvavilnchstgsysvrsvsqkqktecqivgdraaikvnnvlweantiaallnrkpqdltepnqm kkmiiavlfglfsansmaadcavgkiefskyneddtftvkvsgreywtnrwnlqpllqsaqltgmtvtiisntcs…	>stx2	105	M29153	ATGCGACATATATTATTAAAGCTGGTGTTGTTTTTTTGTGTTTGCTTGTCTTCAGCATCTTATGCAGATGAGTTTACTGTGGATTTCTCTTCGCAAAAGAGCTATGTTGATTCATTGAATAGTATAAGGTCGGCAATATCCACTCCACTTGGAAATATATCTCAGGGTGGTGTTTCTGTTTCAGTAATTAATCATGTTCTAGGCGGAAACTATATATCATTGAATGTTAGAGGCCTTGATCCATATAGCGAGAGATTTAACCACCTCCGTTTAATAATGGAACGGAATAACTTATATGTTGCAGGCTTTATTAATACTGAAACGAATATCTTTTACAGATTCTCCGATTTCTCACATATTTCAGTGCCTGATGTGATAACTGTTTCCATGACGACGGAC…
Stx2g-O2-7v	100	AY286000	mkcilfkwvlclllgfssvsysreftidfstqqsyvsslnsirteistslehisqgatsvsvinhtppgsyisvdirgld vyqarfdhlrliieqnnlyvagfvntatntfyrfsdfthisvpgvttvsmttdssyttlqrvaalersgmqisrhslvss ylalmefsgntmtrdasravlrfvtvtaealrfrqiqrefrlalsetapvytmtpedvdltlnwgrisnvlpeyrgedsv rvgrisfnnisailgtvavilnchhqgtrsvryvneemqpecqisgdrpvikinntlwesntaaaflnrksqslyttgem kkmfmavlfalvsvnamaadcakgkiefskyngdntftvkvdgkeywtnrwnlqpllqsaqltgmtvtiksntce…	>stx2	100	AY286000	ATGAAGTGTATATTGTTTAAATGGGTACTGTGCCTGTTACTGGGCTTTTCTTCGGTATCCTATTCCCGGGAATTTACGATAGACTTTTCGACTCAACAAAGTTATGTATCTTCGTTAAATAGTATACGGACAGAAATATCGACCTCTCTTGAGCATATATCTCAGGGGGCTACATCGGTATCTGTTATTAATCATACTCCACCGGGTAGTTATATTTCTGTGGATATCCGAGGGCTTGATGTCTATCAGGCGCGTTTTGACCATCTTCGTCTGATTATTGAGCAAAATAATTTATATGTGGCCGGGTTCGTTAATACGGCCACAAATACTTTCTACCGTTTTTCAGATTTTACACATATATCAGTGCCCGGTGTGACAACTGTTTCCATGACAACGGAC…
Stx2g-O2-HI-11	101	AB048236	mkcilfkwvlclllgfssvsysreftidfstqqsyvsslnsirteistplehisqgatsvsvinhtppgsyisvdirgld iyearfdhlrliieqnnlyvagfvntatntfyrfsdfthisvarvttvsmttdssyttlqrvaalersgmqisrhslvss ylalmefsgntmtrdasravlrfvtvtaealrfrqiqrefrlalsetapvytmtpedvdltlnwgrisnvlpeyrgedsv rvgrisfnnisailgtvavilnchhqgtrsvryvneemqpecqisgdrpvikinntlwesntaaaflnrksqslyttgem kkmfmavlfalvsvnamaadcakgkiefskyngdntftvkvdgkeywtnrwnlqpllqsaqltgmtvtiksntce…	>stx2	101	AB048236	ATGAAGTGTATATTGTTTAAATGGGTACTGTGCCTGTTACTGGGCTTTTCTTCGGTATCCTATTCCCGGGAATTTACGATAGACTTTTCGACTCAACAAAGTTATGTATCTTCGTTAAATAGTATACGGACAGAAATATCGACCCCTCTTGAGCATATATCTCAGGGGGCTACATCGGTATCTGTTATTAATCATACTCCACCGGGTAGTTATATTTCTGTGGATATCCGAGGGCTTGATATCTATGAGGCGCGTTTTGACCATCTTCGTCTGATTATTGAGCAAAATAATTTATATGTGGCCGGGTTCGTTAATACGGCCACAAATACTTTCTACCGTTTTTCAGATTTTACACATATATCAGTGGCCCGTGTGACAACTGTTTCCATGACAACGGAC…
Stx2g-O2-S86	102	AJ966783	mkcilfkwvlclllgfssvsysreftidfstqqsyvsslnsirteistplehisqgatsvsvinhtppgsyisvdirgld iyearfdhlrliieqnnlyvagfvntatntfyrfsdfthisvpgvttvsmttdssyttlqrvaalersgmqisrhslvss ylalmefsgntmtrdasravlrfvtvtaealrfrqiqrefrlalsetapvytmtpedvdltlnwgrisnvlpeyrgedsv rvgrisfnnisailgtvavilnchhqgtrsvryvneemqpecqisgdrpvikinntlwesntaaaflnrksqslyttgem kkmfmavlfalvsvnamaadcakgkiefskyngdntftvkvdgkeywtnrwnlqpllqsaqltgmtvtiksntce…	>stx2	102	AJ966783	ATGAAGTGTATATTATTTAAATGGGTACTGTGCCTGTTACTGGGCTTTTCTTCGGTATCCTATTCCCGGGAATTTACGATAGACTTTTCGACTCAACAAAGTTATGTATCTTCGTTAAATAGTATACGGACAGAAATATCGACCCCTCTTGAGCATATATCTCAGGGGGCTACATCGGTATCTGTTATTAATCATACTCCACCGGGTAGTTATATTTCTGTGGATATCCGAGGGCTTGATATCTATGAGGCGCGTTTTGACCATCTTCGTCTGATTATTGAGCAAAATAATTTATATGTGGCCGGGTTCGTTAATACGGCCACAAATACTTTCTACCGTTTTTCAGATTTTACACATATATCAGTGCCCGGTGTGACAACTGTTTCCATGACAACGGAC…
Stx2g-Out S-8	99	AB048227	mkcilfkwvlclllgfssvsysreftidfstqqtyvsslnsirteistplehisqgatsvsvinhtppgsyisvdirgld iyearfdhlrliieqnnlyvagfvntatntfyrfsdfthisvpgvttvsmttdssyttlqrvaalersgmqisrhslvss ylalmefsgntmtrdasravlrfvtvtaealrfrqiqrefrlalsetapvytmtpedvdltlnwgrisnvlpeyrgedgv rvgrisfnnisailgtvavilnchhqgarsvryvneemqpkcqisgdrpvikinntlwesntaaaflnrksqslyttgem kkmfmavlfalvsvnamaadcakgkiefskyngdntftvkvdgkeywtnrwnlqpllqsaqltgmtvtiksntce…	>stx2	99	AB048227	ATGAAGTGTATATTGTTTAAATGGGTACTGTGCCTGTTACTGGGCTTTTCTTCGGTATCCTATTCCCGGGAATTTACGATAGACTTTTCGACTCAACAAACTTATGTATCTTCGTTAAATAGTATACGGACAGAAATATCGACCCCTCTTGAGCATATATCTCAGGGGGCTACATCGGTATCTGTTATTAATCATACTCCACCGGGTAGTTATATTTCTGTGGATATCCGAGGGCTTGATATCTATGAGGCGCGTTTTGACCATCTTCGTCTGATTATTGAGCAAAATAATTTATATGTGGCCGGGTTCGTTAATACGGCCACAAATACTTTCTACCGTTTTTCAGATTTTACACATATATCAGTGCCCGGTGTGACAACTGTTTCCATGACAACGGAC…
Stx2h-O102 STEC299	122	CP022279	mkcillkwmlclllgfssvsysreftidfstqqsyvsslnsirtaistplehisqgttsvsvinhtspgsyitvdirgld vyqarfdhlrliveqnnlyvagfvntatntfyrfsdfahisvpgvttvsmttdssyttlqrvaalersgmqisrhslvss ylalmefsgnamtreasravlrfvtvtaealrfrqiqrefrqalseaapvytmtpedvdltlnwgrisnvlpefrgedgv rvgrisfnnisailgtvavilnchhqgarsvrsvneekqpecqitgdrpvikinnilwesntaaaflnrrshslyatgem kkmfmvalfalvsvnamaaecakgkiefskyngdntftvkvagkeywtnrwnlqpllqsaqltgmtvtiksitcd…	>stx2	122	CP022279	ATGAAGTGTATATTGTTAAAATGGATGCTGTGCCTGTTACTGGGCTTTTCTTCGGTATCCTATTCCCGGGAGTTTACGATAGACTTTTCGACTCAACAAAGTTATGTCTCTTCGTTAAATAGTATACGGACAGCGATATCGACCCCTCTTGAACATATATCTCAGGGAACCACATCGGTATCTGTTATTAATCATACGTCACCAGGAAGTTATATTACTGTCGATATACGAGGGCTTGATGTCTATCAGGCGCGCTTTGACCATCTTCGCCTGATTGTTGAGCAAAATAATTTATATGTGGCAGGGTTCGTTAATACGGCAACAAATACTTTCTACAGATTTTCAGATTTTGCACATATATCAGTGCCCGGTGTGACAACTGTTTCCATGACAACGGAC…
Stx2i-O9-CB10366	123	FN252457	mkcilfkwvlclllgfssvsysqeftidfstqqsyvsslnsirtaistplehisqgatsvsvinhtppgsyisvgirgld vyqerfdhlrliiernnlyvagfvntttntfyrfsdfahislpgvttismttdssyttlqrvaalersgmqisrhslvss ylalmefsgntmtreasravlrfvtvtaealrfrqiqrefrqalsetapvytmtpedvdltlnwgrisnvlpeyrgedgv rvgrisfnnisailgtvavilnchhqgarfvravneesqpqcqitgdrpvikinnklwesntaaaflnrksqslyttgem kkmfmavlfalvsvnamaadcakgkiefskyngdntftikvdgkeywtnrwnlqpllqsaqltgmtvtiksntcd…	>stx2	123	FN252457	ATGAAGTGTATATTATTTAAATGGGTGCTGTGCCTGTTACTGGGTTTTTCTTCGGTATCCTATTCCCAGGAGTTTACGATAGACTTTTCGACTCAACAAAGTTATGTATCTTCGTTAAATAGTATACGGACAGCGATATCGACCCCTCTTGAACATATATCTCAGGGAGCTACATCGGTATCCGTTATTAATCATACACCACCAGGAAGTTATATTTCCGTAGGTATACGAGGGCTTGATGTTTATCAGGAGCGTTTTGACCATCTTCGTCTGATTATTGAACGAAATAATTTATATGTGGCTGGATTTGTTAATACGACAACAAATACTTTCTACAGATTTTCAGATTTTGCACATATATCATTGCCCGGTGTGACAACTATTTCCATGACAACGGAC…
Stx2j-O158-2010C-4332	152	AATFJO010000039.1	mkcillnlilylllgfssvscsreftidfstqqsylsslnnirtaistplenisqgttsvsvinytppgsyiivdirgld vyqerfdhlrliieqnnlyvagfvntvtntfyrfsdfahisvpgvttvsmttdssyttlqriaalersgmqisrnslvss ylelmefrgnamtraasravlrfvtvtaealrfrqiqrefrpalseaapvytmtpedvdltlnwgrisnvlpefrgedgv rvgritfnnisailgtvavilnchhqgapsvrsvnkdiqeecqitgdrpvikinntlwesytaagflnrkpqslynmkkm fmavlfalvsvnamaadcakgkiefskynendtftvkvagkeywtsrwnlqpllqsaqltgmtvtiksstcasgs…	>stx2	152	AATFJO010000039.1	atgaagtgtatattgttaaatttgatactgtacctgttactgggtttttcttcggtatcctgttcccgggagtttactatagacttttcgactcaacaaagttatctctcttcattgaataatatacgtacagcgatatcgacccctcttgaaaatatatctcagggaaccacatcggtatctgttattaattatacaccaccaggaagttatattatcgtggatatacgggggcttgatgtttatcaggagcgctttgaccatcttcgtctgatcattgagcagaataatttatatgtggccgggtttgttaatacggtaacaaatactttttacagattttcggattttgcgcatatatcagtgccaggtgtgacaacggtttccatgacaacggac…
Stx2j-O162-2012C-4221	125	CP027437	mkcillnlilylllgfssvscsreftidfstqqsylsslnnirtaistplenisqgttsvsvinytppgsyiivdirgld vyqerfdhlrliieqnnlyvagfvntvtntfyrfsdfahisvpgvttvsmttdssyttlqriaalersgmqisrhslvss ylelmefrgnamtraasravlrfvtvtaealrfrqiqrefrpalseaapvytmtpedvdltlnwgrisnvlpefrgedgv rvgritfnnisailgtvavilnchhqgapsvrsvnkdiqeecqitgdrpvikinntlwesytaagflnrkpqslynmkkmf mavlfalvsvnamaadcakgkiefskynendtftvkvagkeywtsrwnlqpllqsaqltgmtvtiksstcasgs…	>stx2	125	CP027437	ATGAAGTGTATATTGTTAAATTTGATACTGTACCTGTTACTGGGTTTTTCTTCGGTATCCTGTTCCCGGGAGTTTACTATAGACTTTTCGACTCAACAAAGTTATCTCTCTTCATTGAATAATATACGTACAGCGATATCGACCCCTCTTGAAAATATATCTCAGGGAACCACATCGGTATCTGTTATTAATTATACACCACCAGGAAGTTATATTATCGTGGATATACGGGGGCTTGATGTTTATCAGGAGCGCTTTGACCATCTTCGTCTGATCATTGAGCAGAATAATTTATATGTGGCCGGGTTTGTTAATACGGTAACAAATACTTTTTACAGATTTTCGGATTTTGCGCATATATCAGTGCCAGGTGTGACAACGGTTTCCATGACAACGGAC…
Stx2j-O183-PNUSAE011983	150	AASBEA010000053	mkcillnlilylllgfssvscsreftidfstqqsylsslnnirtaistplenisqgttsvsvinytspgsyiivdirgld vyqerfdhlrliieqnnlyvagfvntvtntfyrfsdfahisvpgvttvsmttdssyttlqriaalersgmqisrhslvss ylelmefrgnamtrgasravlrfvtvtaealrfrqiqrefrpalseaapvytmtpedvdltlnwgrisnvlpefrgedgv rvgritfnnisailgtvavilnchhqgapsvrsvnediqpecqitgdrpvikinntlweshtaagflnrkpqslynmkkmf mavlfalvsvnamaadcakgkiefskynendtftvkvagkeywtsrwnlqpllqsaqltgmtvtiksstcasgs…	>stx2	150	AASBEA010000053	atgaagtgtatattgttaaatttgatactgtacctgttactgggtttttcttcggtatcctgttcccgggagtttactatagacttttcgactcaacaaagttatctctcttcattgaataatatacggacagcaatatcgacccctcttgaaaatatatctcagggaaccacatcggtatctgttattaattatacatcaccaggaagttatattatcgtggatatacgggggcttgatgtttatcaggagcgctttgaccatcttcgtctgatcattgagcagaataatttatatgtggccgggtttgttaatacggtaacaaatactttttacagattttcggattttgcgcatatatcagtgccaggtgtgacaacggtttccatgacaacggac…
Stx2j-O32-2019C-4307	149	AARDFE010000017	mkcillnlilylllgfssvscsreftidfstqqsylsslnnirtaistplenisqgttsvsvinytppgsyiivdirgld vyqerfdhlrliieqnnlyvagfvntvtntfyrfsdfahisvpgvttvsmttdssyttlqriaalersgmqisrhslvss ylelmefrgnamtraasravlrfvtvtaealrfrqiqrefrpalseaapvytmtpedvdltlnwgrisnvlpefrgedgv rvgritfnnisailgtvavilnchhqgapsvrsvnkdiqeecqitgdrpvikinntlwesytaagflnrksqplynmkkm fmavlfalvsvnamaadcakgkiefskynendtftvkvagkeywtsrwnlqpllqsaqltgmtvtiksstcasgs…	>stx2	149	AARDFE010000017	atgaagtgtatattgttaaatttgatactgtacctgttactgggtttttcttcggtatcctgttcccgggagtttactatagacttttcgactcaacaaagttatctctcttcattgaataatatacgtacagcgatatcgacccctcttgaaaatatatctcagggaaccacatcggtatctgttattaattatacaccaccaggaagttatattatcgtggatatacgggggcttgatgtttatcaggagcgctttgaccatcttcgtctgatcattgagcagaataatttatatgtggccgggtttgttaatacggtaacaaatactttttacagattttcggattttgcgcatatatcagtgccaggtgtgacaacggtttccatgacaacggac…
Stx2j-O33-5447	124	MZ571121	mkcillnlilylllgfssvscsreftidfstqqsylsslnnirtaistplenisqgttsvsvinytppgsyiivdirgld vyqerfdhlrliieqnnlyvagfvntvtntfyrfsdfahisvpgvttvsmttdssyttlqriaalersgmqisrhslvss ylelmefrgnamtraasravlrfvtvtaealrfrqiqrefrpalseaapvytmtpedvdltlnwgrisnvlpefrgedgv rvgritfnnisailgtvavilnchhqgapsvrsvnkdiqeecqitgdrpvikinntlwesytaagflnrksqslynmkkm fmavlfalvsvnamaadcakgkiefskynendtftvkvagkeywtsrwnlqpllqsaqltgmtvtiksstcasgs…	>stx2	124	MZ571121	ATGAAGTGTATATTGTTAAATTTGATACTGTACCTGTTACTGGGTTTTTCTTCGGTATCCTGTTCCCGGGAGTTTACTATAGACTTTTCGACTCAACAAAGTTATCTCTCTTCATTGAATAATATACGTACAGCGATATCGACCCCTCTTGAAAATATATCTCAGGGAACCACATCGGTATCTGTTATTAATTATACACCACCAGGAAGTTATATTATCGTGGATATACGGGGGCTTGATGTTTATCAGGAGCGCTTTGACCATCTTCGTCTGATCATTGAGCAGAATAATTTATATGTGGCCGGGTTTGTTAATACGGTAACAAATACTTTTTACAGATTTTCGGATTTTGCGCATATATCAGTGCCAGGTGTGACAACGGTTTCCATGACAACGGAC…
Stx2j-O33-PNUSAE006803	151	AASOQD010000025	mkcillnlilylllgfssvscsreftidfstqqsylsslnnirtaistplenisqgttsvsvinytppgsyiivdirgld vyqerfdhlrliieqnnlyvagfvntvtntfyrfsdfahisvpgvttvsmttdssyttlqriaalersgmqisrhslvss ylelmefrgnamtraasravlrfvnvtaealrfrqiqrefrpalseaapvytmtpedvdltlnwgrisnvlpefrgedgv rvgritfnnisailgtvavilnchhqgapsvrsvnkdiqeecqitgdrpvikinntlwesytaagflnrksqslynmkkmf mavlfalvsvnamaadcakgkiefskynendtftvkvagkeywtsrwnlqpllqsaqltgmtvtiksstcasgs…	>stx2	151	AASOQD010000025	atgaagtgtatattgttaaatttgatactgtacctgttactgggtttttcttcggtatcctgttcccgggagtttactatagacttttcgactcaacaaagttatctctcttcattgaataatatacgtacagcgatatcgacccctcttgaaaatatatctcagggaaccacatcggtatctgttattaattatacaccaccaggaagttatattatcgtggatatacgggggcttgatgtttatcaggagcgctttgaccatcttcgtctgatcattgagcagaataatttatatgtggccgggtttgttaatacggtaacaaatactttttacagattttcggattttgcgcatatatcagtgccaggtgtgacaacggtttccatgacaacggac…
Stx2j-ONT-PNUSAE018775	147	RUOX02000009	mkcillnlilylllgfssvscsreftidfstqqsylsslnnirtaistplenisqgttsvsvinytppgsyiivdirgld vyqerfdhlrliieqnnlyvagfvntvtntfyrfsdfahisvpgvttvsmttdssyttlqriaalersgmqisrlslvss ylelmefrgnamtrgasravlrfvtviaealrfrqiqrefrpalseaapvytmtpedvdltlnwgrisnvlpefrgeddv rvgritfnnisailgtvavilnchhqgapsvrsvnediqpecqitgdrpvikinntlweshtaagflnrkpqslynmkkmf mavlfalvsvnamaadcakgkiefskynendtftvkvagkeywtsrwnlqpllqsaqltgmtvtiksstcasgs…	>stx2	147	RUOX02000009	atgaagtgtatattgttaaatttgatactgtacctgttactgggtttttcttcggtatcctgttcccgggagtttactatagacttttcgactcaacaaagttatctctcttcattgaataatatacggacagcgatatcgacccctcttgaaaatatatctcagggaaccacatcggtatctgttattaattatacaccaccaggaagttatattatcgtggatatacgggggcttgatgtttatcaggagcgctttgaccatcttcgtctgatcattgagcagaataatttatatgtggccgggtttgttaatacggtaacaaatactttttacagattttcggattttgcgcatatatcagtgccaggtgtgacaacggtttccatgacaacggac…
Stx2k-O159-12GZSW01	126	KC339670	mkcilfkwvlclllgfssvsysqeftidfstqqsyvsslnsirtaistplehisqgatsvsvinhtppgsyisvgirgld vyqahfdhlrliieqnnlyvagfvntatntfyrfsdfahislpgvttismttdssyttlqrvaalersgmqisrhslvss ylalmefsgntmtreasravlrfvtvtaealrfrqiqrefrqalsetapvytmtpedvdltlnwgrisnvlpeyrgedgv rvgrisfnnisailgtvavilnchhqgarsvravneesqpecqitgdrpvikinntlwesntaaaflnrksqslyttgem kkmfmavlfalvsvnamaadcakgkiefskynendtftvkvagkeywtnrwnlqpllqsaqltgmtvtiksstca…	>stx2	126	KC339670	ATGAAGTGTATATTATTTAAATGGGTACTGTGCCTGTTACTGGGTTTTTCTTCGGTATCCTATTCCCAGGAGTTTACGATAGACTTTTCGACTCAACAAAGTTATGTATCTTCGTTAAATAGTATACGGACAGCGATATCGACCCCTCTTGAACATATATCTCAGGGAGCTACATCGGTATCCGTTATTAATCATACACCACCAGGAAGTTATATTTCCGTAGGTATACGAGGGCTTGATGTTTATCAGGCGCATTTTGACCATCTTCGTCTGATTATTGAGCAAAATAATTTATATGTGGCCGGGTTCGTTAATACGGCAACAAATACTTTCTACAGATTTTCAGATTTTGCACATATATCATTGCCCGGTGTGACAACTATTTCCATGACAACGGAC…
Stx2k-O48-STEC309	135	CP041435	mkcilfkwvlclllgfssvsysqeftidfstqqsyvsslnsirtaistplehisqgatsvsvinhtppgsyisvgirgld vyqarfdhlrliieqnnlyvagfvntatntfyrfsdfahislpgvttismttdssyttlqrvaalersgmqisrhslvss ylalmefsgntmtreasravlrfvtvtaealrfrqiqrefrqalsetapvytmtpedvdltlnwgrisnvlpeyrgedgv rvgrisfnnisailgtvavilnchhqgarsvravneesqpecqitgdrpvikinntlwesntaaaflnrksqslyttgem kkmfmavlfalvsvnamaadcakgkiefskynendtftvkvagkeywtnrwnlqpllqsaqltgmtvtiksstca…	>stx2	135	CP041435	ATGAAGTGTATATTATTTAAATGGGTGCTGTGCCTGTTACTGGGTTTTTCTTCGGTATCCTATTCCCAGGAGTTTACGATAGACTTTTCGACTCAACAAAGTTATGTATCTTCGTTAAATAGTATACGGACAGCGATATCGACCCCTCTTGAACATATATCTCAGGGAGCTACATCGGTATCCGTTATTAATCATACACCACCAGGAAGTTATATTTCCGTAGGTATACGAGGGCTTGATGTTTATCAGGCGCGTTTTGACCATCTTCGTCTGATTATTGAGCAAAATAATTTATATGTGGCCGGGTTCGTTAATACGGCAACAAATACTTTCTACAGATTTTCAGATTTTGCACATATATCATTGCCCGGTGTGACAACTATTTCCATGACAACGGAC…
Stx2l-O8-FHI-1106-1092	98	AM904726	mkcillkwilclllgfssvpysreftidfstqqsyvsslnsirtaistplehisqgatsvsvinhtppgsyisvgirgld vyqerfdhlrliiernnlyvagfvntttntfyrfsdfahislpgvttismttdssyttlqrvaalersgmqisrhslvss ylalmefsgntmtrdasravlrfvtvtaealrfrqiqrefrqalsetapvytmtpgdvdltlnwgrisnvlpeyrgedgv rvgrisfnnisailgtvavilnchhqgtrsvravnevsqpecqitgdrpvikinntlwesntaaaflnrksqslyttgem kkmfmavlfalvsvnamaadcakgkiefskyneddtftvkvdgkeywtsrwnlqpllqsaqltgmtvtiksstca…	>stx2	98	AM904726	ATGAAGTGTATATTGTTAAAGTGGATACTGTGCCTGTTACTGGGTTTTTCTTCGGTTCCCTATTCCCGGGAGTTTACGATAGACTTTTCGACTCAACAAAGTTATGTATCTTCGTTAAATAGTATACGGACAGCGATATCGACCCCTCTTGAACATATATCTCAGGGAGCTACATCGGTATCCGTTATTAATCATACACCACCAGGAAGTTATATTTCCGTAGGTATACGAGGGCTTGATGTTTATCAGGAGCGTTTTGACCATCTTCGTCTGATTATTGAACGAAATAATTTATATGTGGCTGGATTTGTTAATACGACAACAAATACTTTCTACAGATTTTCAGATTTTGCACATATATCATTGCCCGGTGTGACAACTATTTCCATGACAACGGAC…
Stx2m-O38-2019C-3762	145	AARGRV010000082.1	mkcilfkwvlclllgfssvsysreftidfstqqsyvsslnsirteistplehisqgttsvsvinhtppgsyfavdirgldvyqarfdhlrliieqnnlyvagfvntatntfyrfsdfshisvpgvttvsmttdssyttlqrvaalersgmqisrqslvssylalmefsgnamtrevarsalrfvtvtaealrfrqiqrgfrlalsetapvytmtpedvdltlnwgrisnvlpefraedsvrvgrisfnnisailgtvavilnchhhgarsvrsvneeiqpecqitgdrpvikinnilwesntaaaflnrksqslyttgemkkmfvavlfalvsvnamaadcakgkiefskynedntftvkvdgkeywtnrwnlqpllqsaqltgmtvtiksnscesgsg…	>stx2	145	AARGRV010000082.1	atgaagtgtatattatttaaatgggtactgtgcctgttactgggtttttcttcggtatcctattcccgggagtttacgatagacttttcgacccaacaaagttatgtctcttcgttaaatagtatacggacagaaatatcgacccctcttgaacatatatctcaggggaccacctcagtgtctgttattaaccacaccccgccgggcagttattttgctgtggatatacgagggcttgatgtctatcaggcgcgttttgaccatcttcgtctgattattgagcaaaataatttatatgtggccgggttcgttaatacggcaacaaatactttctaccgtttttcagatttttcacatatatcagtgcccggagtgacaacggtttccatgacaacggac…
Stx2m-O96-2001F31428	128	OQ054797	mkcilfkwvlclllgfssvsysreftidfstqqsyvsslnsirteistplehisqgttsvsvinhtppgsyfavdirgld vyqarfdhlrliieqnnlyvagfvntatntfyrfsdfshisvpgvttvsmttdssyttlqrvaalersgmqisrqslvss ylalmefsgnamtrevarsalrfvtvtaealrfrqiqrgfrlalsetapvytmtpedvdltlnwgrisnvlpefraedsv rvgrisfnnisailgtvavilnchhhgarsvrsvneeiqpecqitgdrpvikinnilwesntaaaflnrksqslyttgem kkmfvavlfalvsvnamaadcakgkiefskynedntftvkvdgkeywtnrwnlqpllqsaqltgmtvtiksnsce…	>stx2	128	OQ054797	ATGAAGTGTATATTATTTAAATGGGTACTGTGCCTGTTACTGGGTTTTTCTTCGGTATCCTATTCCCGGGAGTTTACGATAGACTTTTCGACCCAACAAAGTTATGTCTCTTCGTTAAATAGTATACGGACAGAAATATCGACCCCTCTTGAACATATATCTCAGGGGACCACCTCAGTGTCTGTTATTAACCACACCCCGCCGGGCAGTTATTTTGCTGTGGATATACGAGGGCTTGATGTCTATCAGGCGCGTTTTGACCATCTTCGTCTGATTATTGAGCAAAATAATTTATATGTGGCCGGGTTCGTTAATACGGCAACAAATACTTTCTACCGTTTTTCAGATTTTTCACATATATCAGTGCCCGGAGTGACAACGGTTTCCATGACAACGGAC…
Stx2n-O1-2013C-3244	148	CP113094.1	mkciflkwllclllnfsaisyareftidfssqqsyvsslnsirtaistplenisqggtsvsvinhtppgsyiavdirgldvyqarfdhlrliveqnnlyvagfvntatntfyrfsdfshisvpgvttvsmttdssyttlqrvaalersgmqisrhslvssylalmefsgnamnseasrailrfvtvtaealrfrqiqrefrkalseaapvytmtsedvdltlnwgrisnvlpeyrgeegvrvgrisfnslpailgsvavilnchhqgarsvrsvnqekqpecqitgdrpvikinnilwesntaaaflnrksqsmkkmlvavlfalvsvnamaadcakgkiefskyngnntftvkvagkeywtnrwnlqpllqsaqltgmtvtiksvtcdsgsgfaevqfn	>stx2	148	CP113094.1	atgaagtgtatattcttgaagtggttgctgtgtcttttattaaatttctctgctatatcttatgcccgtgagtttacaatagacttttcgtctcaacaaagttatgtatcttcgttaaatagtatacgcacagcgatatcgacaccccttgaaaatatatctcaggggggtacatcggtatcggttattaatcatacgccaccaggaagttatattgccgtagatatacgagggcttgatgtttatcaggcgcgttttgaccaccttcgtctgattgttgagcaaaataatttatatgtggctggatttgttaatacggcaacaaatactttctacagattttcagatttttcacatatatcagtgcccggtgtgacaacggtttccatgacaacagac…
Stx2n-O23 2017C-4317	132	CP113092.1	mkciflkwllclllnfsaisyareftidfssqqsyvsslnsirtaistplenisqggtsvsvinhtppgsyiavdirgld vyqarfdhlrliveqnnlyvagfvntatntfyrfsdfshisvpgvttvsmttdssyttlqrvaalersgmqisrhslvss ylalmefsgnamnseasrailrfvtvtaealrfrqiqrefrkalseaapvytmtsedvdltlnwgrisnvlpeyrgeegv rvgrisfnslpailgsvavilnchhqgarsvrsvnqekqpecqitgdrpvikinnilwesntaaaflnrksqsmkkmlva vlfalvsvnamaadcakgkiefskyngnntftvkvagkeywtnrwnlqpllqsaqltgmtvtiksvtcdsgsgfa…	>stx2	132	SAMN07709929	ATGAAGTGTATATTCTTGAAGTGGTTGCTGTGTCTTTTATTAAATTTCTCTGCTATATCTTATGCCCGTGAGTTTACAATAGACTTTTCGTCTCAACAAAGTTATGTATCTTCGTTAAATAGTATACGCACAGCGATATCGACACCCCTTGAAAATATATCTCAGGGGGGTACATCGGTATCGGTTATTAATCATACGCCACCAGGAAGTTATATTGCCGTAGATATACGAGGGCTTGATGTTTATCAGGCGCGTTTTGACCACCTTCGTCTGATTGTTGAGCAAAATAATTTATATGTGGCTGGATTTGTTAATACGGCAACAAATACTTTCTACAGATTTTCAGATTTTTCACATATATCAGTGCCCGGTGTGACAACGGTTTCCATGACAACAGAC…
Stx2o-O75-2018C-3367	142	CP113091	mkcillkwvlclllgfssvsysreftidfstqqsyvsslnsirtaistpleyisqgatsvsvinhtppgsyiavdirgld iyqarfdhlrlivdqnnlyvagfvntatntfyrfsdfahisvpgvttvsmttdssyttlqrvaalersgmqisrhslvss ylalmefsgnamtreasravlrfvtvtaealrfrqiqrefrqalseaapvytmtpedvdltlnwgrisnvlpafrgedgv rvgrisfnnisailgtmavilnchhqearsvrsvneykqpecqitgdrsvikinnilwesntaaaflnrksqslydtgkm kkmfivalfslvsvnamaadcakgkiefskyngnntftvkvagkeywtnrwnlqpllqsaqltgmtvtiksitcd…	>stx2	142	CP113091	atgaagtgtatattgttaaaatgggtactgtgcctgttactgggcttttcttcggtatcctattcccgggagtttacgatagacttttcgactcaacaaagttatgtctcttcattaaatagtattcgaacagcgatatcgacccctcttgagtatatatctcagggagctacatcggtatccgttattaatcatacgccaccaggaagttatattgccgtagatatacgagggcttgatatttatcaggcgcgttttgaccatcttcgtctgattgttgatcaaaataatttatatgtggctggatttgttaatacagcaacaaatactttctacagattttcagattttgcacatatatcagtgcccggtgtgacaacggtttccatgacaacggac…
Stx2o-O85 03-3638	133	MZ229604	mkcillkwvlclllgfssvsysreftidfstqqsyvsslnsirtaistplehisqgatsvsvinhtppgsyiavdirgld iyqarfdhlrlivdqnnlyvagfvntatntfyrfsdfahisvpgvttvsmttdssyttlqrvaalersgmqisrhslvss ylalmefsgnamtreasravlrfvtvtaealrfrqiqrefrqalseaapvytmtpedvdltlnwgrisnvlpafrgedgv rvgrisfnnisailgtmavilnchhqgarsvrsvneykqpecqitgdrsvikinnilwesntaaaflnrksqslydtgkm kkmfivalfslvsvnamaadcakgkiefskyngnntftvkvagkeywtnrwnlqpllqsaqltgmtvtiksitcd…	>stx2	133	MZ229604	ATGAAGTGTATATTGTTAAAATGGGTACTGTGCCTGTTACTGGGCTTTTCTTCGGTATCCTATTCCCGGGAGTTTACGATAGACTTTTCGACTCAACAAAGTTATGTCTCTTCATTAAATAGTATTCGAACAGCGATATCGACCCCTCTTGAGCATATATCTCAGGGAGCTACATCGGTATCCGTTATTAATCATACGCCACCAGGAAGTTATATTGCCGTAGATATACGAGGGCTTGATATTTATCAGGCGCGTTTTGACCATCTTCGTCTGATTGTTGATCAAAATAATTTATATGTGGCTGGATTTGTTAATACAGCAACAAATACTTTCTACAGATTTTCAGATTTTGCACATATATCAGTGCCCGGTGTGACAACGGTTTCCATGACAACGGAC…
